# Supplementary material for: Tetrazolopyrimidine-tethered phenothiazine molecular hybrids: synthesis, biological and molecular docking studies
Source: Royal Society of Chemistry journal article supplement (doi:10.1039/d3nj05817d), 2024-01-01
Supplement: d3nj05817d1.pdf [file d3nj05817d1.pdf]

## **Tetrazolopyrimidine Tethered Phenothiazine Molecular Hybrids: Synthesis, Biological and Molecular Docking Studies**

Shunmugam Iniyaval,<sup>a</sup> Vadivel Saravanan<sup>a</sup>, Chun-Wai Mai<sup>b</sup> and Chennan Ramalingan<sup>a\*</sup>

<sup>a</sup> *Department of Chemistry, School of Advanced Sciences, Kalasalingam Academy of Research and Education (Deemed to be University), Krishnankoil, 626126, Tamilnadu, India*

<sup>b</sup> *Department of Pharmaceutical Chemistry, UCSI University, 56000, Kuala Lumpur, Malaysia*

### **Supplementary Information**

**Table S1. Atomic coordinates ( $\times 10^4$ ) and equivalent isotropic displacement parameters ( $\text{\AA}^2 \times 10^3$ ) for non-H atoms with esd's in parenthesis**

| <b>Atom</b> | <b>x</b> | <b>y</b> | <b>z</b> | <b>Ueq</b> |
|-------------|----------|----------|----------|------------|
| S(1)        | 867(1)   | 3839(1)  | 2100(1)  | 43(1)      |
| O(1)        | 4411(1)  | 969(1)   | 3203(1)  | 60(1)      |
| O(2)        | 3684(1)  | 1132(1)  | 4633(1)  | 47(1)      |
| N(1)        | 4551(1)  | 4699(2)  | 3279(1)  | 42(1)      |
| N(2)        | 4284(1)  | 6316(2)  | 4397(2)  | 45(1)      |
| N(3)        | 3832(1)  | 6343(2)  | 5274(2)  | 48(1)      |
| N(4)        | 3508(1)  | 5336(2)  | 5499(1)  | 42(1)      |
| N(5)        | 3749(1)  | 4613(2)  | 4749(1)  | 33(1)      |
| N(6)        | -314(1)  | 3391(2)  | 3887(1)  | 32(1)      |
| C(1)        | 3480(1)  | 3391(2)  | 4665(2)  | 30(1)      |
| C(2)        | 4067(1)  | 2855(2)  | 3860(2)  | 33(1)      |
| C(3)        | 4538(1)  | 3501(2)  | 3207(2)  | 38(1)      |
| C(4)        | 4215(1)  | 5225(2)  | 4098(2)  | 34(1)      |
| C(5)        | 5102(2)  | 3052(2)  | 2377(2)  | 62(1)      |
| C(6)        | 4086(1)  | 1581(2)  | 3834(2)  | 36(1)      |
| C(7)        | 3644(2)  | -125(2)  | 4717(2)  | 52(1)      |
| C(8)        | 3203(2)  | -402(3)  | 5675(2)  | 82(1)      |
| C(9)        | 2482(1)  | 3326(2)  | 4449(2)  | 28(1)      |
| C(10)       | 1877(1)  | 3056(2)  | 5187(2)  | 32(1)      |
| C(11)       | 961(1)   | 3086(2)  | 5008(2)  | 33(1)      |
| C(12)       | 615(1)   | 3376(2)  | 4079(1)  | 28(1)      |
| C(13)       | 1230(1)  | 3623(2)  | 3324(1)  | 29(1)      |
| C(14)       | 2146(1)  | 3611(2)  | 3518(1)  | 30(1)      |
| C(15)       | -187(1)  | 4464(2)  | 2328(2)  | 35(1)      |
| C(16)       | -553(2)  | 5205(2)  | 1623(2)  | 47(1)      |
| C(17)       | -1427(2) | 5586(2)  | 1697(2)  | 53(1)      |
| C(18)       | -1928(2) | 5233(2)  | 2495(2)  | 49(1)      |
| C(19)       | -1565(1) | 4533(2)  | 3219(2)  | 41(1)      |
| C(20)       | -685(1)  | 4126(2)  | 3157(2)  | 31(1)      |
| C(21)       | -914(1)  | 2807(2)  | 4590(2)  | 33(1)      |
| C(22)       | -1212(1) | 3474(2)  | 5501(2)  | 36(1)      |
| C(23)       | -1827(2) | 2719(2)  | 6127(2)  | 47(1)      |
| C(24)       | -2145(2) | 3278(2)  | 7069(2)  | 60(1)      |

**Table S2. Bond lengths (Å) and bond angles (°) with esd's in parenthesis**

| <b>Atoms</b> | <b>Bond length</b> | <b>Atoms</b>      | <b>Bond length</b> |
|--------------|--------------------|-------------------|--------------------|
| S(1)-C(13)   | 1.739(4)           | C(20)-C(15)-S(1)  | 120.4(2)           |
| S(1)-C(15)   | 1.748(4)           | C(17)-C(16)-C(15) | 120.9(2)           |
| O(1)-C(6)    | 1.201(3)           | C(18)-C(17)-C(16) | 118.8(2)           |
| O(2)-C(6)    | 1.332(3)           | C(19)-C(18)-C(17) | 121.0(3)           |
| O(2)-C(7)    | 1.446(4)           | C(18)-C(19)-C(20) | 121.3(2)           |
| N(1)-C(4)    | 1.350(3)           | C(15)-C(20)-C(19) | 117.3(2)           |
| N(1)-C(3)    | 1.377(4)           | C(15)-C(20)-N(6)  | 121.0(2)           |
| N(1)-H(1)    | 0.8600             | C(19)-C(20)-N(6)  | 121.7(2)           |
| N(2)-C(4)    | 1.316(4)           | N(6)-C(21)-C(22)  | 118.2(2)           |
| N(2)-N(3)    | 1.358(4)           | C(21)-C(22)-C(23) | 109.8(2)           |
| N(3)-N(4)    | 1.286(3)           | C(24)-C(23)-C(22) | 114.7(2)           |
| N(4)-N(5)    | 1.351(3)           | <b>Atoms</b>      | <b>Bond angle</b>  |
| N(5)-C(4)    | 1.319(3)           | C(13)-S(1)-C(15)  | 99.5(1)            |
| N(5)-C(1)    | 1.461(4)           | C(6)-O(2)-C(7)    | 117.8(2)           |
| N(6)-C(12)   | 1.399(4)           | C(4)-N(1)-C(3)    | 119.8(2)           |
| N(6)-C(20)   | 1.400(3)           | C(4)-N(2)-N(3)    | 104.3(2)           |
| N(6)-C(21)   | 1.463(3)           | N(4)-N(3)-N(2)    | 111.7(2)           |
| C(1)-C(9)    | 1.508(4)           | N(3)-N(4)-N(5)    | 105.9(2)           |
| C(1)-C(2)    | 1.521(3)           | C(4)-N(5)-N(4)    | 108.0(2)           |
| C(1)-H(1A)   | 0.9800             | C(4)-N(5)-C(1)    | 127.1(2)           |
| C(2)-C(3)    | 1.346(3)           | N(4)-N(5)-C(1)    | 124.8(2)           |
| C(2)-C(6)    | 1.461(4)           | C(12)-N(6)-C(20)  | 121.1(2)           |
| C(3)-C(5)    | 1.488(4)           | C(12)-N(6)-C(21)  | 118.7(2)           |
| C(7)-C(8)    | 1.480(4)           | C(20)-N(6)-C(21)  | 119.1(2)           |
| C(9)-C(10)   | 1.375(3)           | N(5)-C(1)-C(9)    | 109.2(2)           |
| C(9)-C(14)   | 1.379(4)           | N(5)-C(1)-C(2)    | 106.5(2)           |
| C(10)-C(11)  | 1.379(4)           | C(9)-C(1)-C(2)    | 114.2(2)           |
| C(11)-C(12)  | 1.383(4)           | C(3)-C(2)-C(6)    | 121.6(2)           |
| C(12)-C(13)  | 1.396(3)           | C(3)-C(2)-C(1)    | 122.8(2)           |
| C(13)-C(14)  | 1.380(4)           | C(6)-C(2)-C(1)    | 115.6(2)           |
| C(15)-C(16)  | 1.378(4)           | C(2)-C(3)-N(1)    | 120.7(2)           |
| C(15)-C(20)  | 1.393(4)           | C(2)-C(3)-C(5)    | 126.3(2)           |
| C(16)-C(17)  | 1.372(4)           | N(1)-C(3)-C(5)    | 113.0(2)           |

|                   |          |                   |          |
|-------------------|----------|-------------------|----------|
| C(17)-C(18)       | 1.367(4) | N(2)-C(4)-N(5)    | 110.1(2) |
| C(18)-C(19)       | 1.366(4) | N(2)-C(4)-N(1)    | 130.0(2) |
| C(19)-C(20)       | 1.390(4) | N(5)-C(4)-N(1)    | 119.9(2) |
| C(21)-C(22)       | 1.510(4) | O(1)-C(6)-O(2)    | 121.6(2) |
| C(22)-C(23)       | 1.515(3) | O(1)-C(6)-C(2)    | 127.4(2) |
| C(23)-C(24)       | 1.496(4) | O(2)-C(6)-C(2)    | 111.0(2) |
| C(11)-C(12)-C(13) | 117.3(2) | O(2)-C(7)-C(8)    | 107.4(2) |
| C(11)-C(12)-N(6)  | 121.8(2) | O(2)-C(7)-H(7A)   | 110.2    |
| C(13)-C(12)-N(6)  | 120.9(2) | C(8)-C(7)-H(7A)   | 110.2    |
| C(14)-C(13)-C(12) | 120.7(2) | O(2)-C(7)-H(7B)   | 110.2    |
| C(14)-C(13)-S(1)  | 118.4(2) | C(10)-C(9)-C(14)  | 118.0(2) |
| C(12)-C(13)-S(1)  | 120.7(2) | C(10)-C(9)-C(1)   | 121.2(2) |
| C(9)-C(14)-C(13)  | 121.4(2) | C(14)-C(9)-C(1)   | 120.7(2) |
| C(16)-C(15)-C(20) | 120.6(2) | C(9)-C(10)-C(11)  | 121.1(2) |
| C(16)-C(15)-S(1)  | 118.7(2) | C(10)-C(11)-C(12) | 121.4(2) |

**Table S3. Torsion angles (°) with esd's in parenthesis**

| <b>Atoms</b>           | <b>Torsion angle</b> | <b>Atoms</b>            | <b>Torsion angle</b> |
|------------------------|----------------------|-------------------------|----------------------|
| C(4)-N(2)-N(3)-N(4)    | 0.0(2)               | C(9)-C(10)-C(11)-C(12)  | 0.8(3)               |
| N(2)-N(3)-N(4)-N(5)    | 0.0(2)               | C(10)-C(11)-C(12)-C(13) | 0.8(3)               |
| N(3)-N(4)-N(5)-C(4)    | 0.0(2)               | C(10)-C(11)-C(12)-N(6)  | 178.9(2)             |
| N(3)-N(4)-N(5)-C(1)    | -176.4(2)            | C(20)-N(6)-C(12)-C(11)  | 151.9(2)             |
| C(4)-N(5)-C(1)-C(9)    | -106.9(2)            | C(21)-N(6)-C(12)-C(11)  | -15.9(3)             |
| N(4)-N(5)-C(1)-C(9)    | 68.8(3)              | C(20)-N(6)-C(12)-C(13)  | -30.1(3)             |
| C(4)-N(5)-C(1)-C(2)    | 16.9(3)              | C(21)-N(6)-C(12)-C(13)  | 162.2(2)             |
| N(4)-N(5)-C(1)-C(2)    | -167.4(2)            | C(11)-C(12)-C(13)-C(14) | -2.0(3)              |
| N(5)-C(1)-C(2)-C(3)    | -16.0(3)             | N(6)-C(12)-C(13)-C(14)  | 179.8(2)             |
| C(9)-C(1)-C(2)-C(3)    | 104.7(2)             | C(11)-C(12)-C(13)-S(1)  | 172.9(2)             |
| N(5)-C(1)-C(2)-C(6)    | 164.3(2)             | N(6)-C(12)-C(13)-S(1)   | -5.2(3)              |
| C(9)-C(1)-C(2)-C(6)    | -75.1(2)             | C(15)-S(1)-C(13)-C(14)  | -152.9(2)            |
| C(6)-C(2)-C(3)-N(1)    | -176.4(2)            | C(15)-S(1)-C(13)-C(12)  | 32.0(2)              |
| C(1)-C(2)-C(3)-N(1)    | 3.9(3)               | C(10)-C(9)-C(14)-C(13)  | -0.2(3)              |
| C(6)-C(2)-C(3)-C(5)    | 2.0(4)               | C(1)-C(9)-C(14)-C(13)   | -176.1(2)            |
| C(1)-C(2)-C(3)-C(5)    | -177.8(2)            | C(12)-C(13)-C(14)-C(9)  | 1.8(3)               |
| C(4)-N(1)-C(3)-C(2)    | 10.9(3)              | S(1)-C(13)-C(14)-C(9)   | -173.3(2)            |
| C(4)-N(1)-C(3)-C(5)    | -167.7(2)            | C(13)-S(1)-C(15)-C(16)  | 153.2(2)             |
| N(3)-N(2)-C(4)-N(5)    | 0.0(2)               | C(13)-S(1)-C(15)-C(20)  | -33.3(2)             |
| N(3)-N(2)-C(4)-N(1)    | -178.7(2)            | C(20)-C(15)-C(16)-C(17) | -2.9(3)              |
| N(4)-N(5)-C(4)-N(2)    | 0.0(2)               | S(1)-C(15)-C(16)-C(17)  | 170.7(2)             |
| C(1)-N(5)-C(4)-N(2)    | 176.3(2)             | C(15)-C(16)-C(17)-C(18) | 1.1(4)               |
| N(4)-N(5)-C(4)-N(1)    | 178.9(2)             | C(16)-C(17)-C(18)-C(19) | 1.3(4)               |
| C(1)-N(5)-C(4)-N(1)    | -4.8(3)              | C(17)-C(18)-C(19)-C(20) | -1.9(4)              |
| C(3)-N(1)-C(4)-N(2)    | 167.9(2)             | C(16)-C(15)-C(20)-C(19) | 2.2(3)               |
| C(3)-N(1)-C(4)-N(5)    | -10.8(3)             | S(1)-C(15)-C(20)-C(19)  | -171.3(2)            |
| C(7)-O(2)-C(6)-O(1)    | -0.5(3)              | C(16)-C(15)-C(20)-N(6)  | -178.8(2)            |
| C(7)-O(2)-C(6)-C(2)    | 179.8(2)             | S(1)-C(15)-C(20)-N(6)   | 7.7(3)               |
| C(3)-C(2)-C(6)-O(1)    | -9.1(4)              | C(18)-C(19)-C(20)-C(15) | 0.1(3)               |
| C(1)-C(2)-C(6)-O(1)    | 170.7(2)             | C(18)-C(19)-C(20)-N(6)  | -178.8(2)            |
| C(3)-C(2)-C(6)-O(2)    | 170.6(2)             | C(12)-N(6)-C(20)-C(15)  | 28.7(3)              |
| C(1)-C(2)-C(6)-O(2)    | -9.6(3)              | C(21)-N(6)-C(20)-C(15)  | -163.6(2)            |
| C(6)-O(2)-C(7)-C(8)    | 177.9(2)             | C(12)-N(6)-C(20)-C(19)  | -152.4(2)            |
| N(5)-C(1)-C(9)-C(10)   | -102.1(2)            | C(21)-N(6)-C(20)-C(19)  | 15.3(3)              |
| C(2)-C(1)-C(9)-C(10)   | 138.7(2)             | C(12)-N(6)-C(21)-C(22)  | 84.4(2)              |
| N(5)-C(1)-C(9)-C(14)   | 73.6(2)              | C(20)-N(6)-C(21)-C(22)  | -83.6(3)             |
| C(2)-C(1)-C(9)-C(14)   | -45.5(3)             | N(6)-C(21)-C(22)-C(23)  | 179.9(2)             |
| C(14)-C(9)-C(10)-C(11) | -1.0(3)              | C(21)-C(22)-C(23)-C(24) | 178.3(2)             |
| C(1)-C(9)-C(10)-C(11)  | 174.8(2)             |                         |                      |

**Table S4. Geometric details of hydrogen bond (Å,°)**  
**(D-donor; A-acceptor; H-hydrogen)**

| <b>Interactions</b> | <b>D-H</b> | <b>H...A</b> | <b>D...A</b> | <b>D-H...A</b> |
|---------------------|------------|--------------|--------------|----------------|
| N1-H1...O1          | 0.86       | 2.07         | 2.912        | 167            |
| C19-H19...N4        | 0.93       | 2.60         | 3.369        | 141            |
| C11-H11...S1        | 0.93       | 2.94         | 3.570        | 126            |

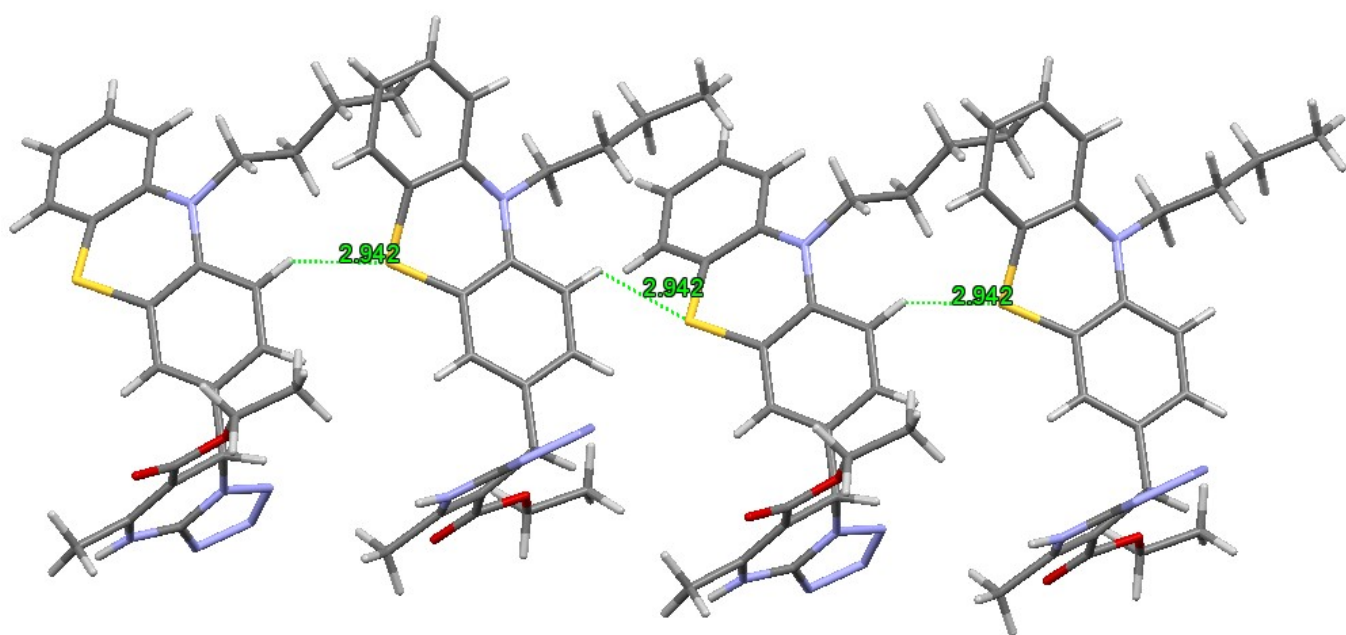

**Fig S1.** Intermolecular C11-H11...S1 interactions in compound **6b**.

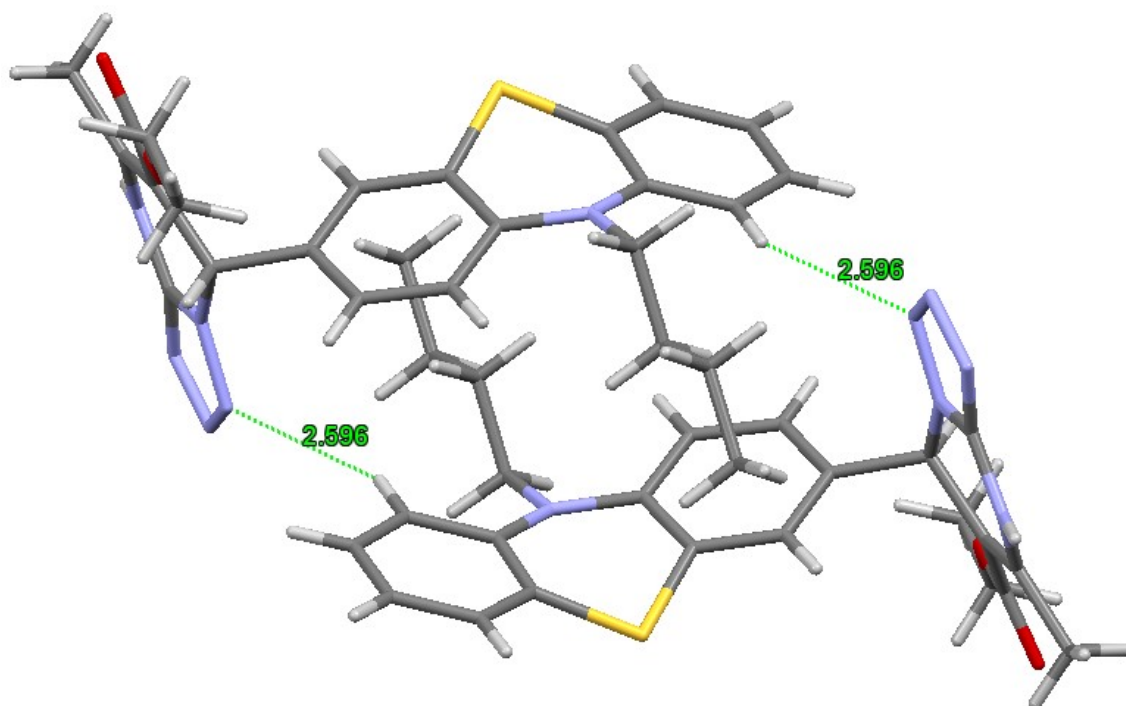

**Fig S2.** Intermolecular C19-H19...N4 interactions in compound. (22 number)



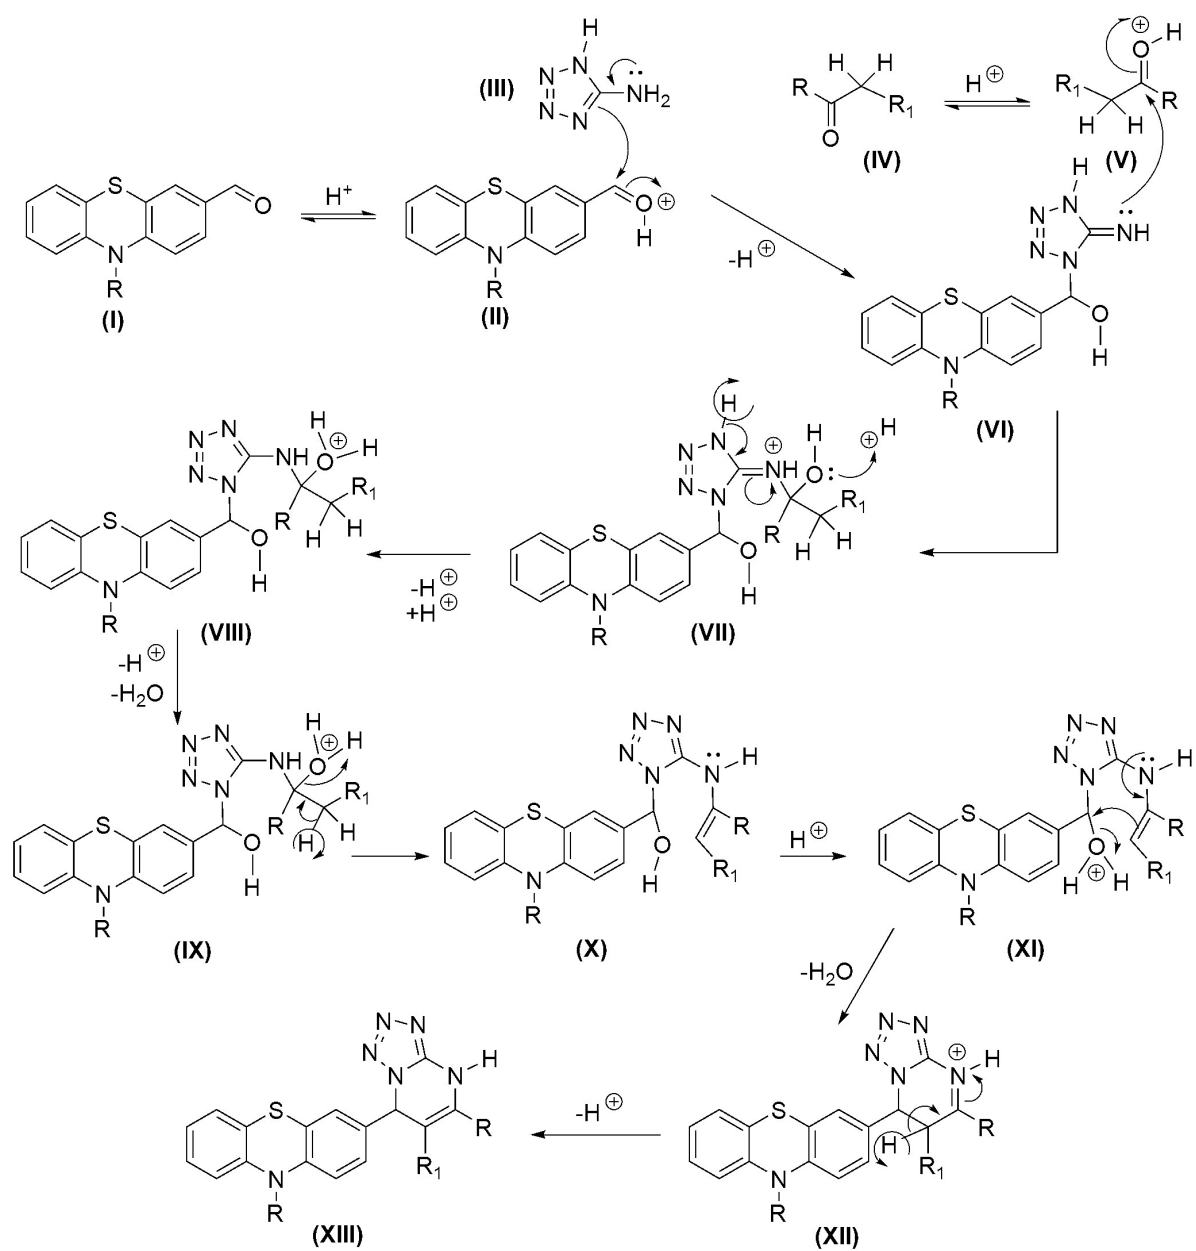

**Scheme S1.** Plausible mechanism for the synthesis of tetrazolopyrimidine tethered phenothiazine molecular hybrids

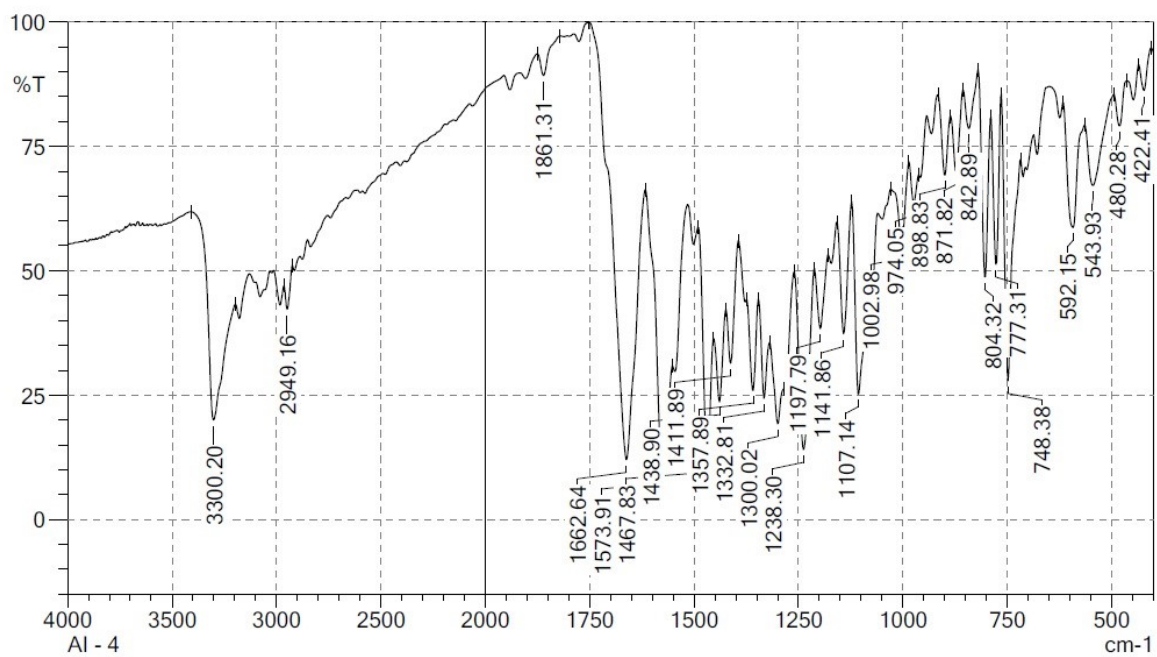

FT-IR Spectrum of 5a

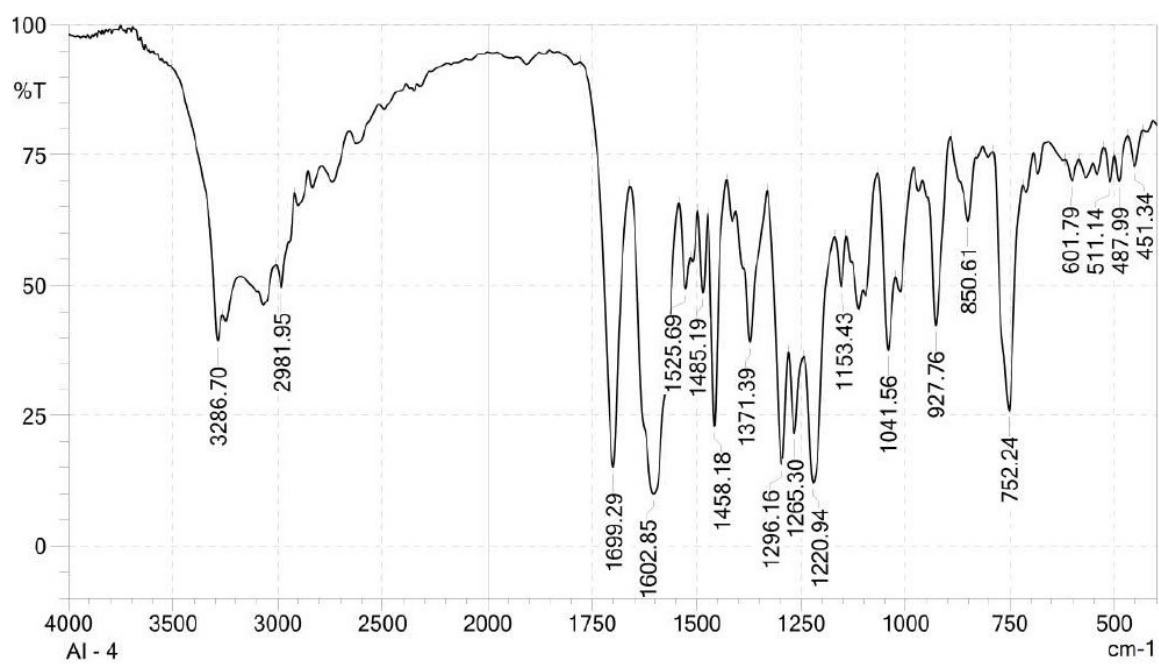

FT-IR Spectrum of **5b**

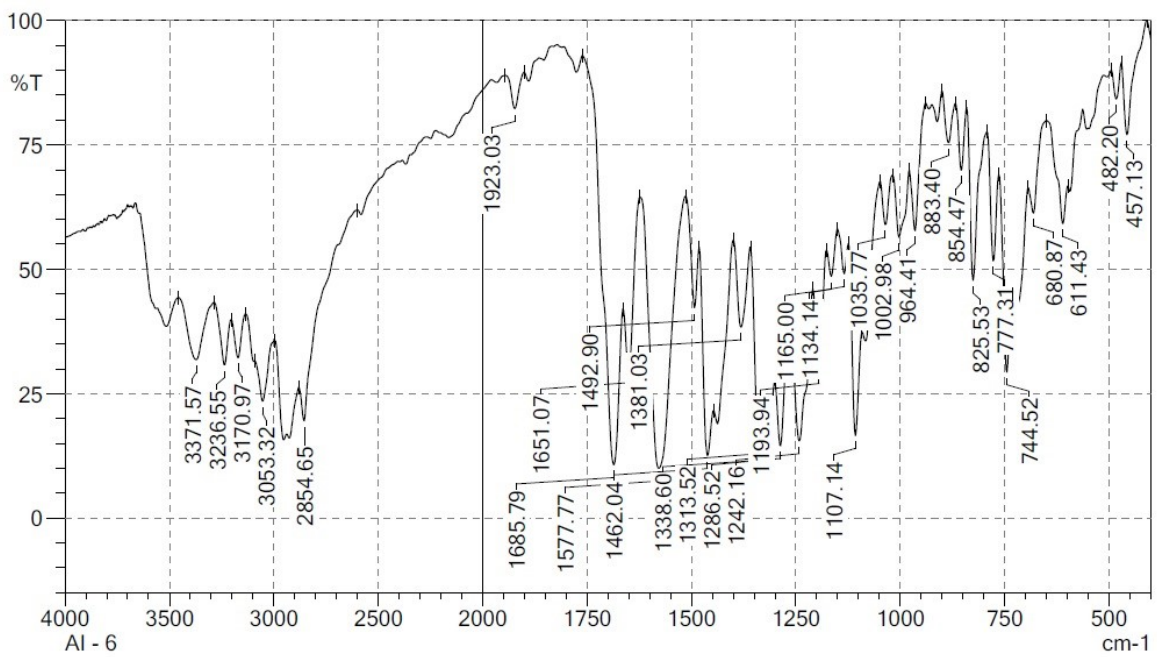

FT-IR Spectrum of 5c

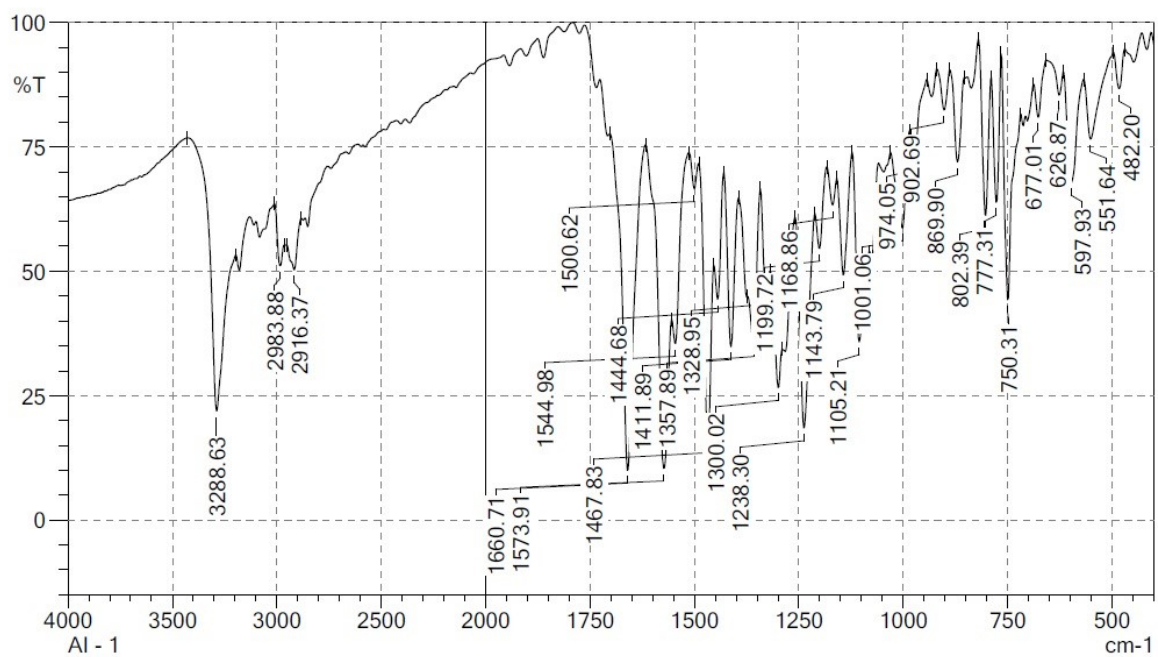

FT-IR Spectrum of **6a**

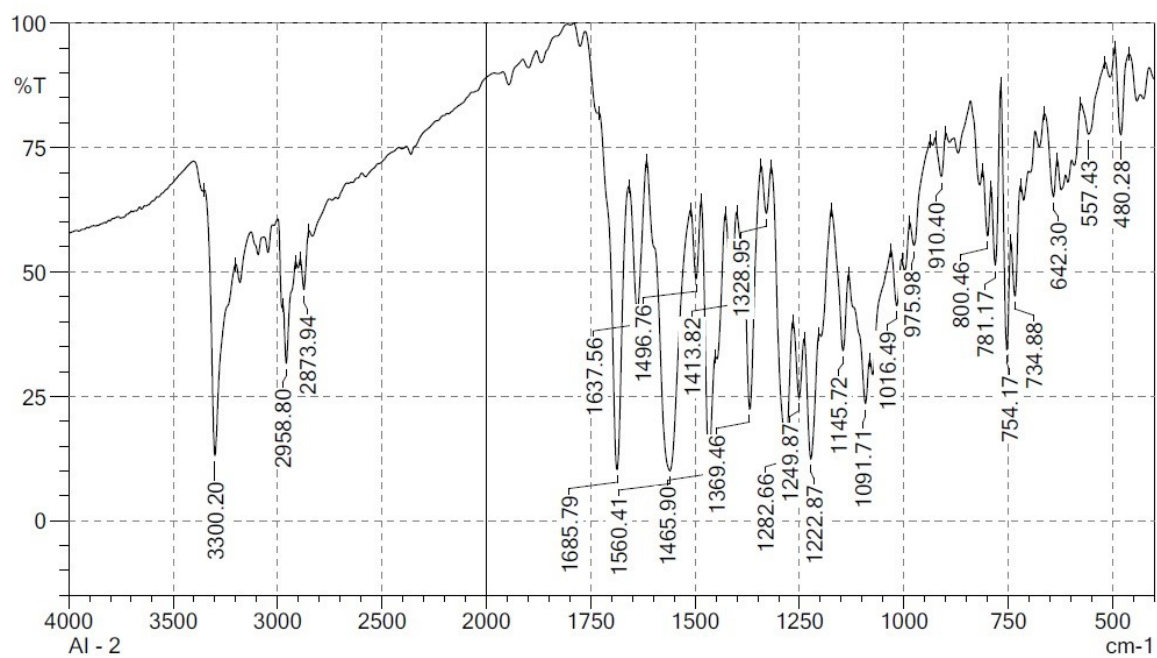

FT-IR Spectrum of **6b**

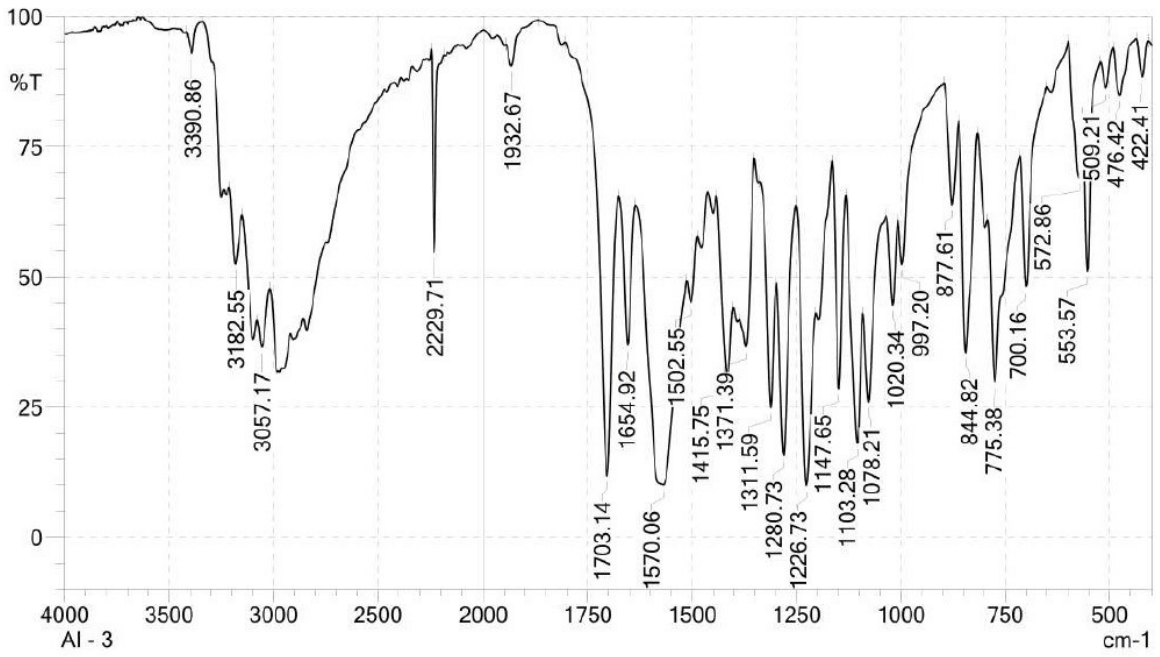

FT-IR Spectrum of **6c**

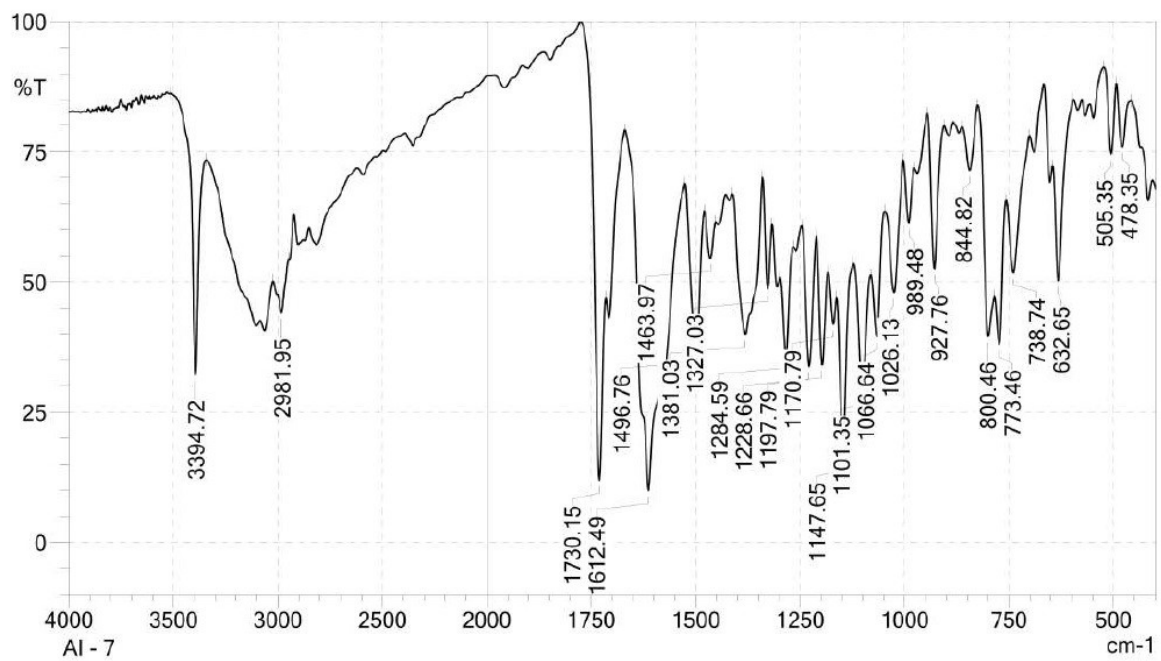

FT-IR Spectrum of 7a



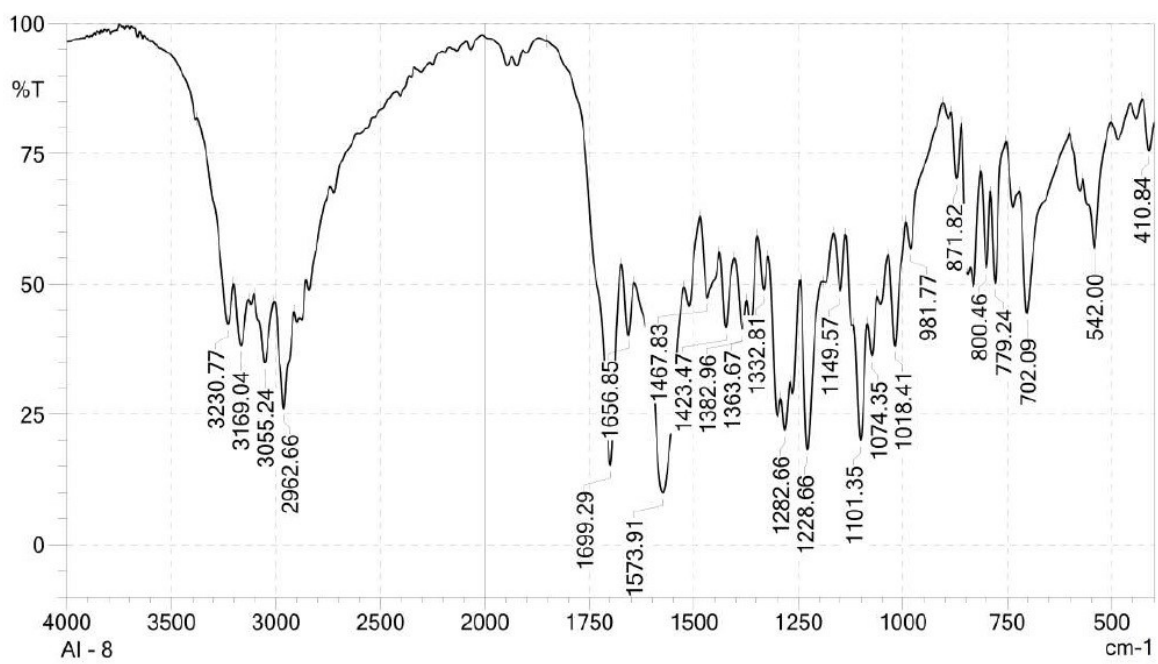

FT-IR Spectrum of **7b**

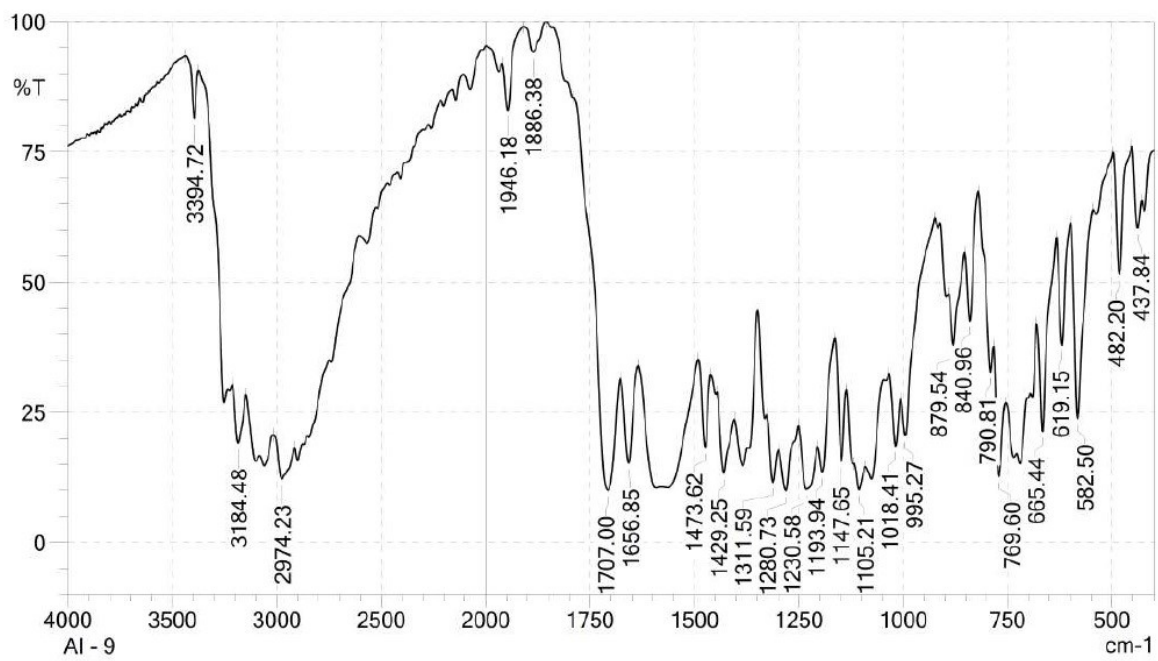

FT-IR Spectrum of **8a**

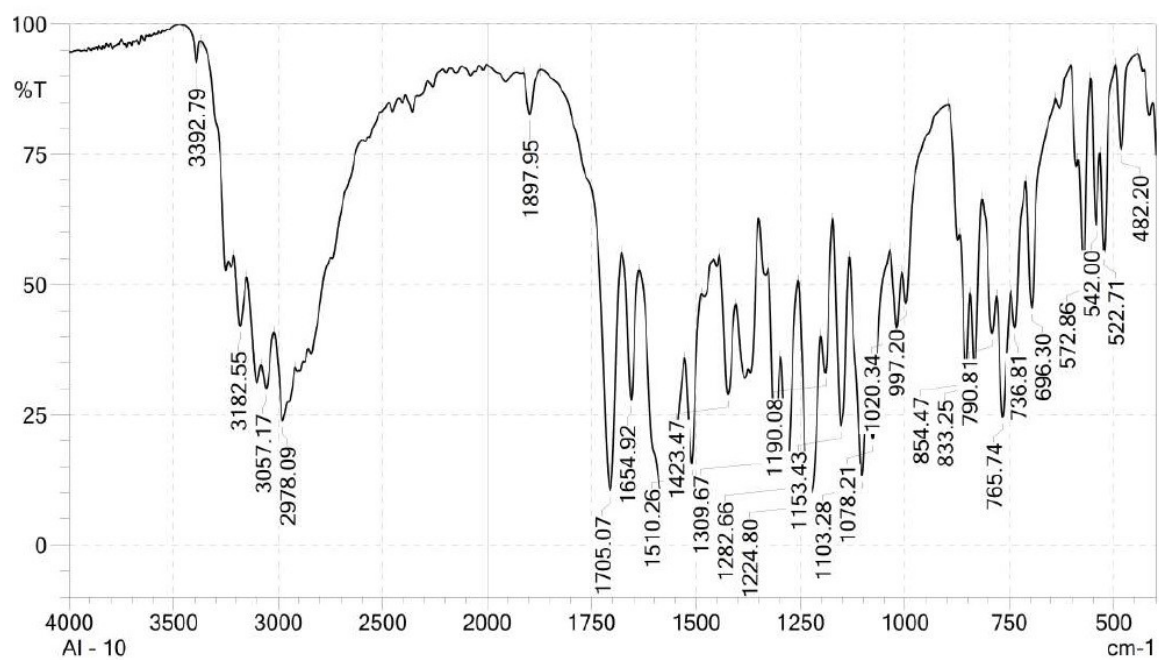

FT-IR Spectrum of **9a**

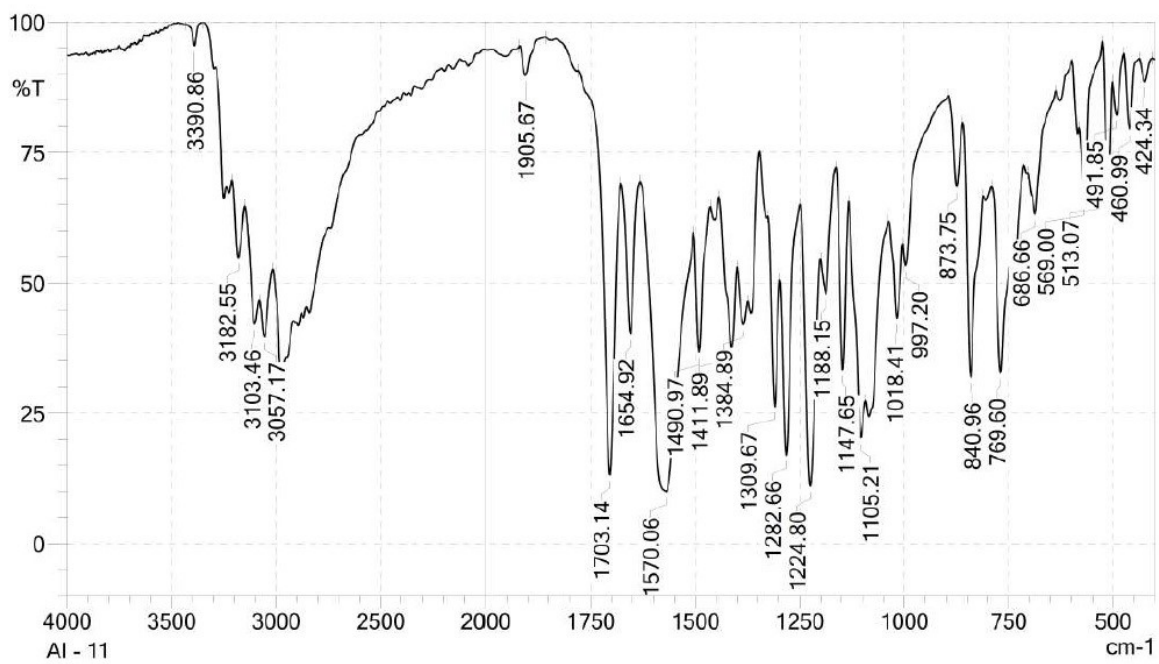

FT-IR Spectrum of **9b**

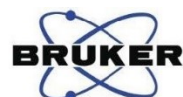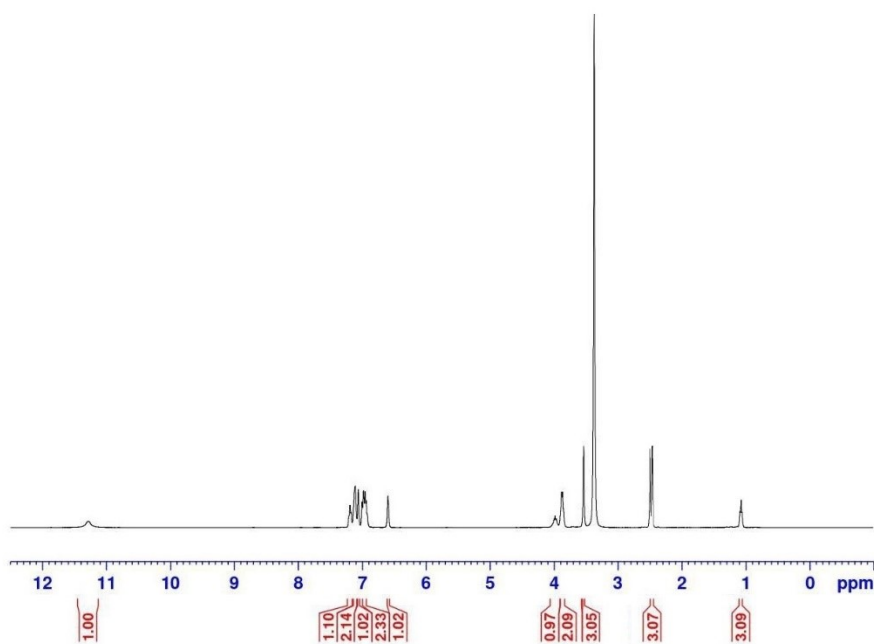

Current Data Parameters  
NAME AI-2 1H  
EXPNO 1  
PROCNO 1

F2 - Acquisition Parameters  
Date\_ 20190906  
Time 17.56 h  
INSTRUM spect  
PROBHD Z108618\_0903 (   
PULPROG zg30  
TD 65536  
SOLVENT DMSO  
NS 16  
DS 2  
SWH 8012.820 Hz  
FIDRES 0.244532 Hz  
AQ 4.0894465 sec  
RG 100.4  
DN 62.400 usec  
DE 6.50 usec  
TE 296.5 K  
D1 1.00000000 sec  
TDO 1  
SFO1 400.2324714 MHz  
NUCL 1H  
P1 14.00 usec  
PLW1 13.95600033 W

F2 - Processing parameters  
SI 65536  
SF 400.2300000 MHz  
WDW EM  
SSB 0  
LB 0.30 Hz  
GB 0  
PC 1.00

<sup>1</sup>H NMR Spectrum of 5a

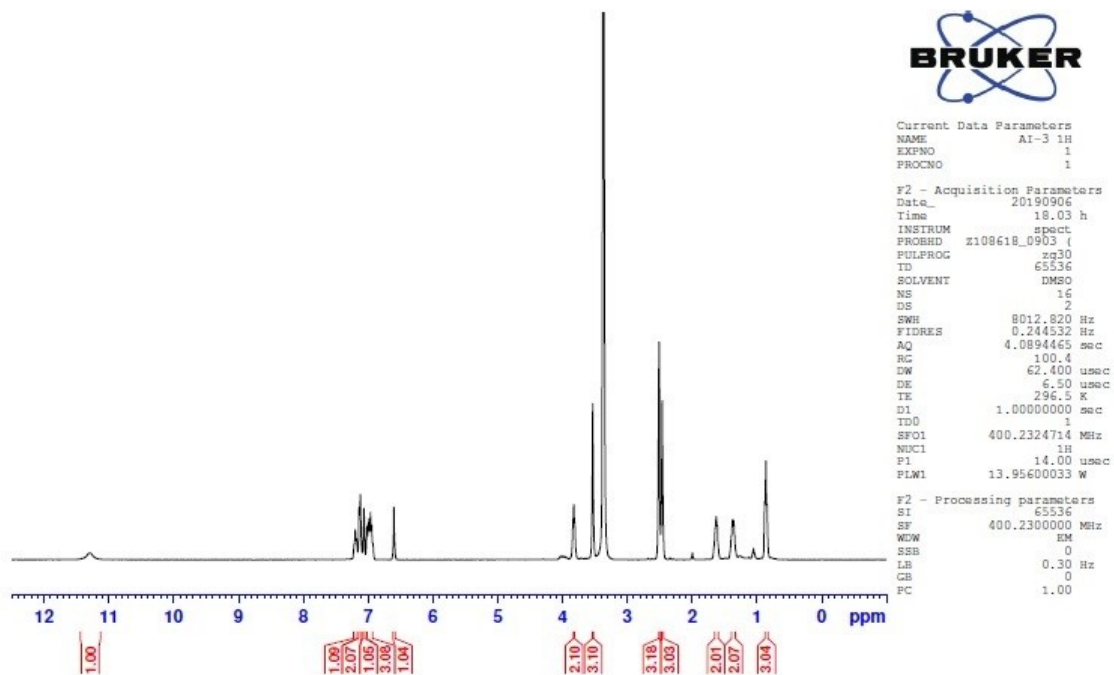

<sup>1</sup>H NMR Spectrum of **5b**

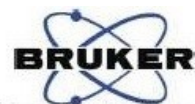

Current Data Parameters  
NAME AI-4 1H  
EXPNO 1  
PROCNO 1

F2 - Acquisition Parameters  
Date\_ 20190906  
Time 18.10 h  
INSTRUM spect  
PROBHD X108618\_0903 f  
PULPROG zg30  
TD 65536  
SOLVENT DMSO  
NS 16  
DS 2  
SWH 8012.820 Hz  
FIDRES 0.244532 Hz  
AQ 4.0894465 sec  
RG 79.52  
DW 62.400 usec  
DE 6.50 usec  
TE 296.4 K  
D1 1.00000000 sec  
TDD 1  
SFO1 400.2324714 MHz  
NUC1 1H  
P1 14.00 usec  
PLW1 13.95600033 W

F2 - Processing parameters  
SI 65536  
SF 400.2300000 MHz  
WDW EM  
SSB 0  
LB 0.30 Hz  
GB 0  
PC 1.00

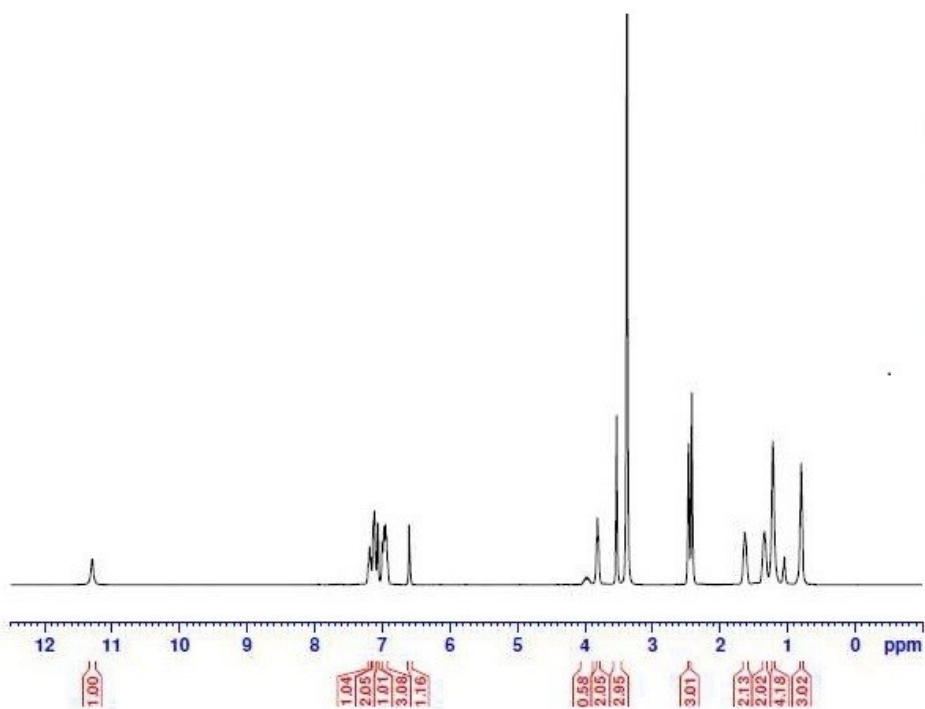

<sup>1</sup>H NMR Spectrum of 5c

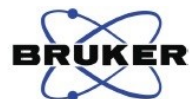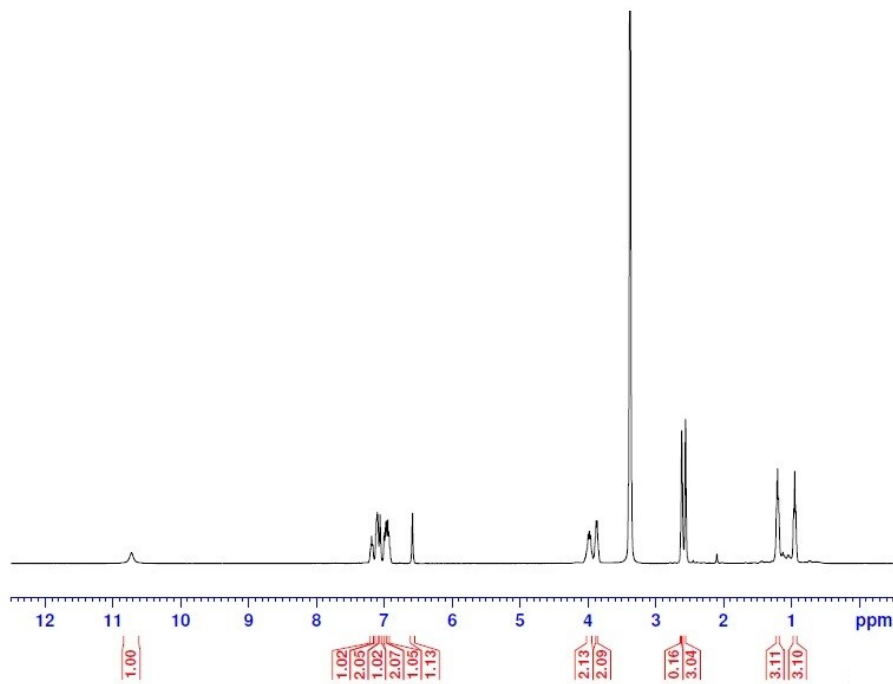

Current Data Parameters  
NAME AI-1 1H  
EXPNO 1  
PROCNO 1

F2 - Acquisition Parameters  
Date\_ 20190906  
Time 17.49 h  
INSTRUM spect  
PROBHD Z108618\_0903 ( )  
PULPROG zg30  
TD 65536  
SOLVENT DMSO  
NS 16  
DS 2  
SWH 8012.820 Hz  
FIDRES 0.244532 Hz  
AQ 4.0894465 sec  
RG 89.97  
DW 62.400 usec  
DE 6.50 usec  
TE 296.6 K  
D1 1.00000000 sec  
TD0 1  
SFO1 400.2324714 MHz  
NUC1 1H  
P1 14.00 usec  
PLW1 13.95600033 W

F2 - Processing parameters  
SI 65536  
SF 400.2300000 MHz  
WDW EM  
SSB 0  
LB 0.30 Hz  
GB 0  
PC 1.00

<sup>1</sup>H NMR Spectrum of **6a**



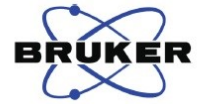

Current Data Parameters  
NAME AI 12.8 1H  
EXPNO 1  
PROCNO 1

F2 - Acquisition Parameters  
Date\_ 20190202  
Time 16.48 h  
INSTRUM spect  
PROBHD Z108618\_0903 (  
PULPROG zg30  
TD 65536  
SOLVENT CDCl3  
NS 16  
DS 2  
SWH 8012.820 Hz  
FIDRES 0.244532 Hz  
AQ 4.0894465 sec  
RG 199.04  
EW 62.400 usec  
DE 6.50 usec  
TE 295.2 K  
D1 1.00000000 sec  
TD0 1  
SF01 400.2324714 MHz  
NUC1 1H  
P1 14.00 usec  
PLW1 13.9560033 W

F2 - Processing parameters  
SI 65536  
SF 400.230085 MHz  
WDW EM  
SSB 0  
LB 0.30 Hz  
GB 0  
PC 1.00

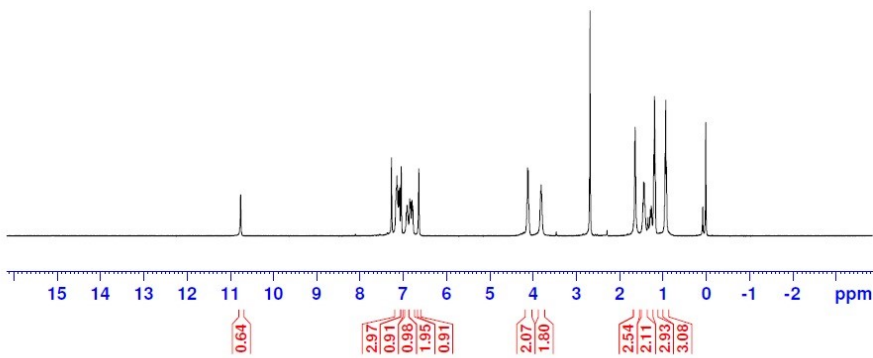

$^1\text{H}$  NMR Spectrum of **6b**

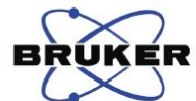

Current Data Parameters  
NAME AI 12.9 1H  
EXPNO 1  
PROCNO 1

F2 - Acquisition Parameters  
Date\_ 20190202  
Time 16.54 h  
INSTRUM spect  
PROBHD Z108618\_0903 (   
PULPROG zg30  
TD 65536  
SOLVENT CDCl3  
NS 16  
DS 2  
SWH 8012.820 Hz  
FIDRES 0.244532 Hz  
AQ 4.0894465 sec  
RG 199.04  
DW 62.400 usec  
DE 6.50 usec  
TE 295.2 K  
D1 1.0000000 sec  
D11 1  
TDO 1  
SFO1 400.2324714 MHz  
NUC1 1H  
P1 14.00 usec  
PLW1 13.95600033 W

F2 - Processing parameters  
SI 65536  
SF 400.2300085 MHz  
WDW EM  
SSB 0  
LB 0.30 Hz  
GB 0  
PC 1.00

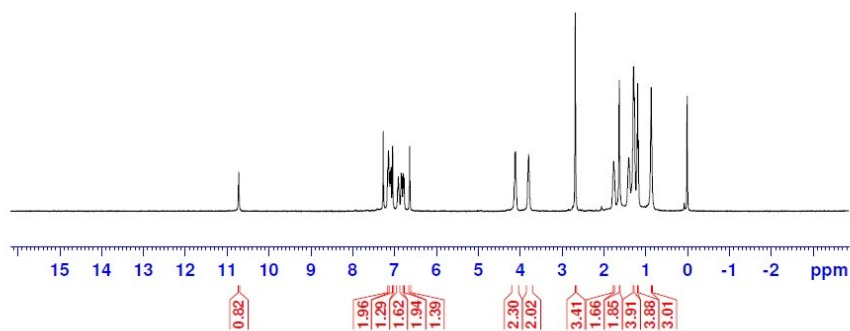

<sup>1</sup>H NMR Spectrum of **6c**

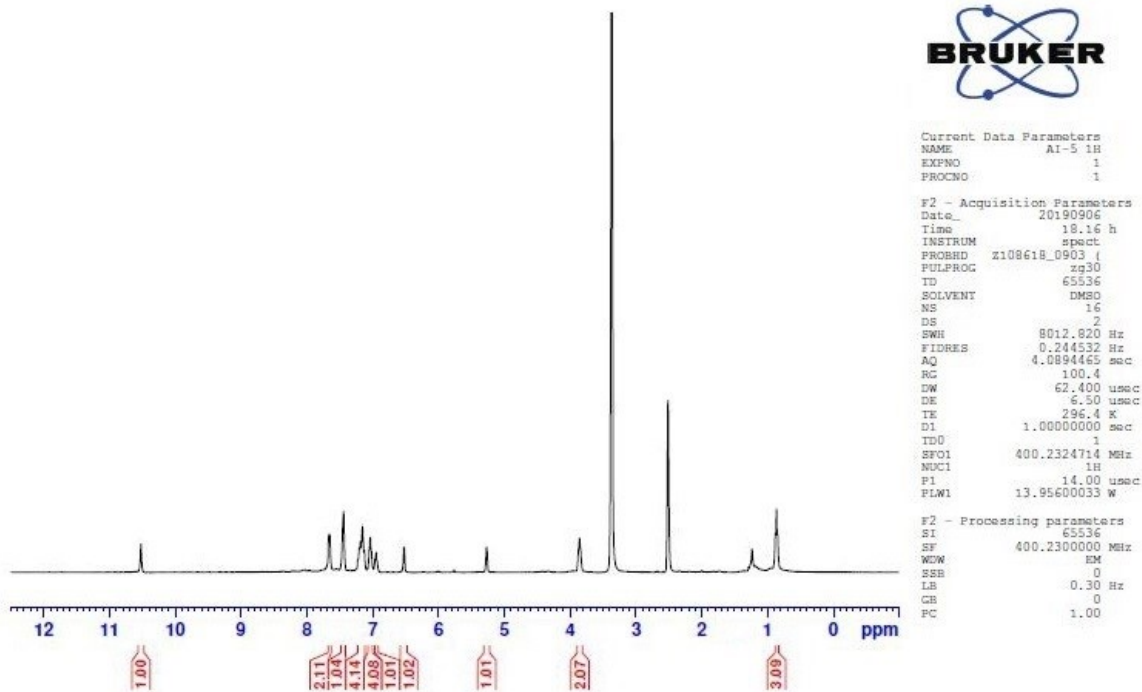

<sup>1</sup>H NMR Spectrum of **7a**

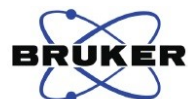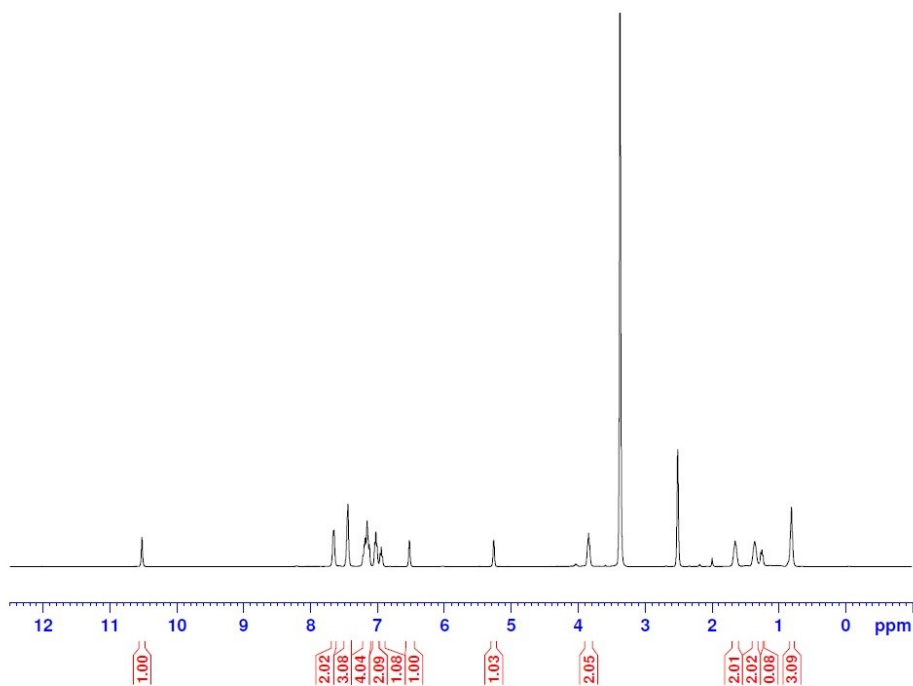

Current Data Parameters  
NAME AI-6 1H  
EXPNO 1  
PROCNO 1

F2 - Acquisition Parameters  
Date\_ 20190906  
Time 18.23 h  
INSTRUM spect  
PROBHD z108618\_0903 ( )  
PULPROG zg30  
TD 65536  
SOLVENT DMSO  
NS 16  
DS 2  
SWH 8012.820 Hz  
FIDRES 0.244532 Hz  
AQ 4.0894465 sec  
RG 89.97  
DW 62.400 usec  
DE 6.50 usec  
TE 296.4 K  
D1 1.00000000 sec  
D11 1  
TD0 1  
SFO1 400.2324714 MHz  
NUC1 1H  
P1 14.00 usec  
PLW1 13.95600033 W

F2 - Processing parameters  
SI 65536  
SF 400.2300000 MHz  
WDW EM  
SSB 0  
LB 0.30 Hz  
GB 0  
PC 1.00

<sup>1</sup>H NMR Spectrum of **7b**

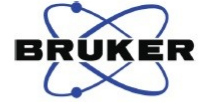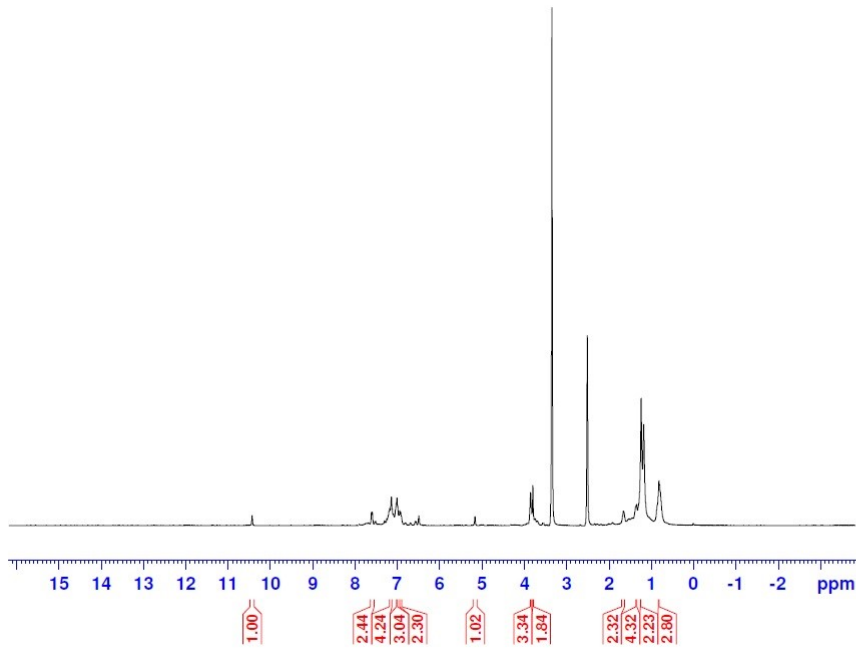

Current Data Parameters  
NAME AI-9 1H  
EXPNO 1  
PROCNO 1

F2 - Acquisition Parameters  
Date\_ 20190907  
Time 15.38 h  
INSTRUM spect  
PROBHD Z108618\_0903 (  
PULPROG zg30  
TD 65536  
SOLVENT DMSO  
NS 16  
DS 2  
SWH 8012.820 Hz  
FIDRES 0.244532 Hz  
AQ 4.0894465 sec  
RG 113.89  
DW 62.400 usec  
DE 6.50 usec  
TE 296.7 K  
D1 1.00000000 sec  
TDO 1  
SFO1 400.2324714 MHz  
NUC1 1H  
P1 14.00 usec  
PLW1 13.95600033 W

F2 - Processing parameters  
SI 65536  
SF 400.2300009 MHz  
WDW EM  
SSB 0  
LB 0.30 Hz  
GB 0  
PC 1.00

<sup>1</sup>H NMR Spectrum of 8a

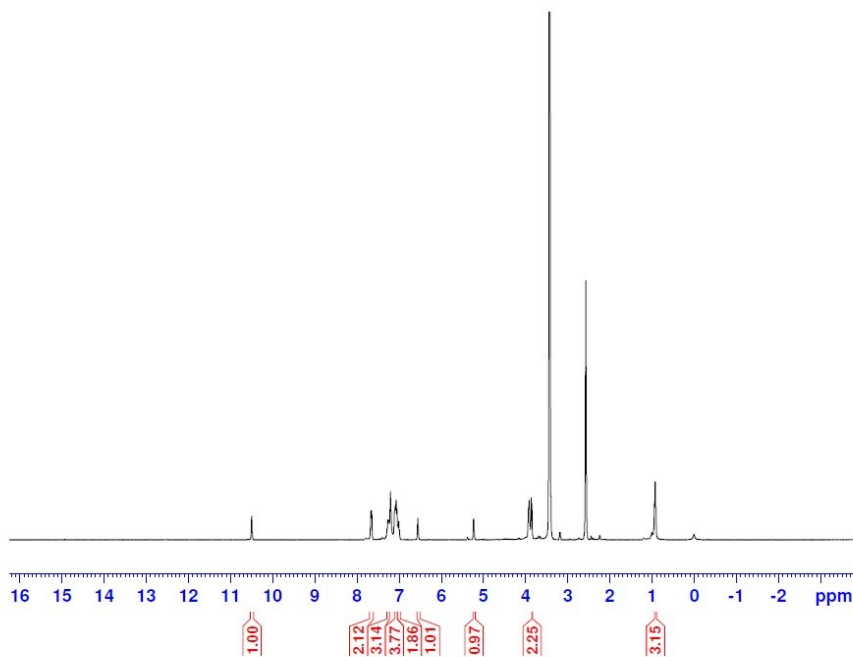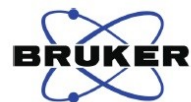

```

Current Data Parameters
NAME      AI-7 1H
EXPNO    1
PROCNO   1

F2 - Acquisition Parameters
Date_    20190906
Time     18.29 h
INSTRUM  spect
PROBHD   Z108618_0903 (
PULPROG  zg30
TD        65536
SOLVENT  DMSO
NS        16
DS        2
SWH       8012.820 Hz
FIDRES    0.244532 Hz
AQ        4.0894465 sec
RG        113.89
DW        62.400 usec
DE        6.50 usec
TE        296.3 K
D1        1.0000000 sec
D10       1
SFO1      400.2324714 MHz
NUC1      1H
P1        14.00 usec
PLW1      13.95600033 W

F2 - Processing parameters
SI        65536
SF        400.2299775 MHz
WDW       EM
SSB       0
LB        0.30 Hz
GB        0
PC        1.00
  
```

<sup>1</sup>H NMR Spectrum of **9a**

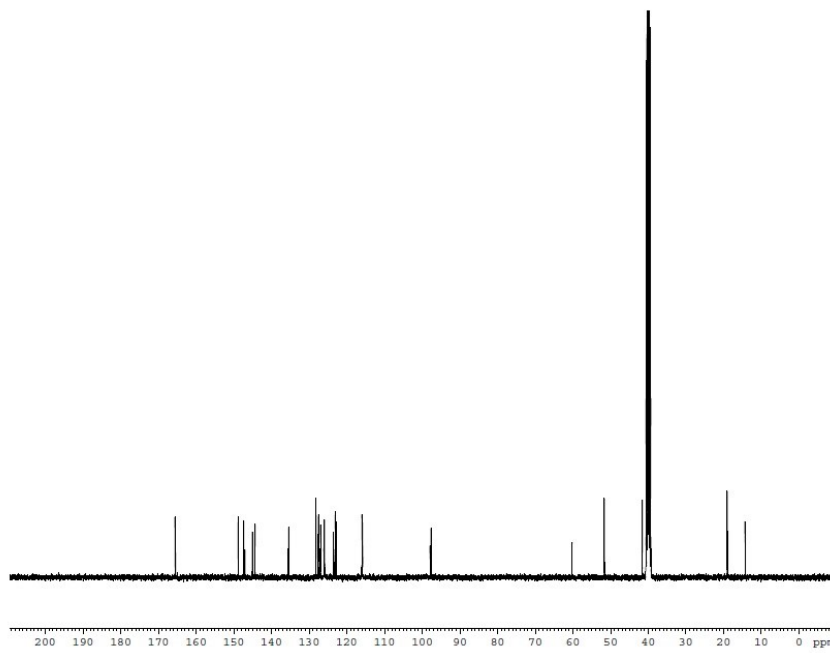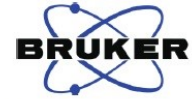

```

Current Data Parameters
NAME      AI2 13C
EXPNO    1
PROCNO   1

F2 - Acquisition Parameters
Date_    20190903
Time     14.03 h
INSTRUM  spect
PROBHD   Z108618_0903 (
PULPROG  zgpg30
TD       65536
SOLVENT  DMSO
NS       1024
DS       4
SWH      24038.461 Hz
FIDRES   0.733596 Hz
AQ       1.3631488 sec
RG       199.04
DW       20.800 usec
DE       6.50 usec
TE       297.4 K
D1       2.0000000 sec
D11      0.0300000 sec
TD0      1
SFO1     100.6479773 MHz
NUC1     13C
P1       10.00 usec
PLW1     51.72800064 W
SFO2     400.2316009 MHz
NUC2     1H
CPDPRG2  waltz16
PCPD2    90.00 usec
PLW2     13.95600033 W
PLW12    0.33892259 W
PLW13    0.16986801 W

F2 - Processing parameters
SI       32768
SF       100.6379135 MHz
WDW      EM
SSB      0
LB       1.00 Hz
GB       0
PC       1.40

```

<sup>13</sup>C NMR Spectrum of **5a**

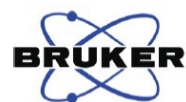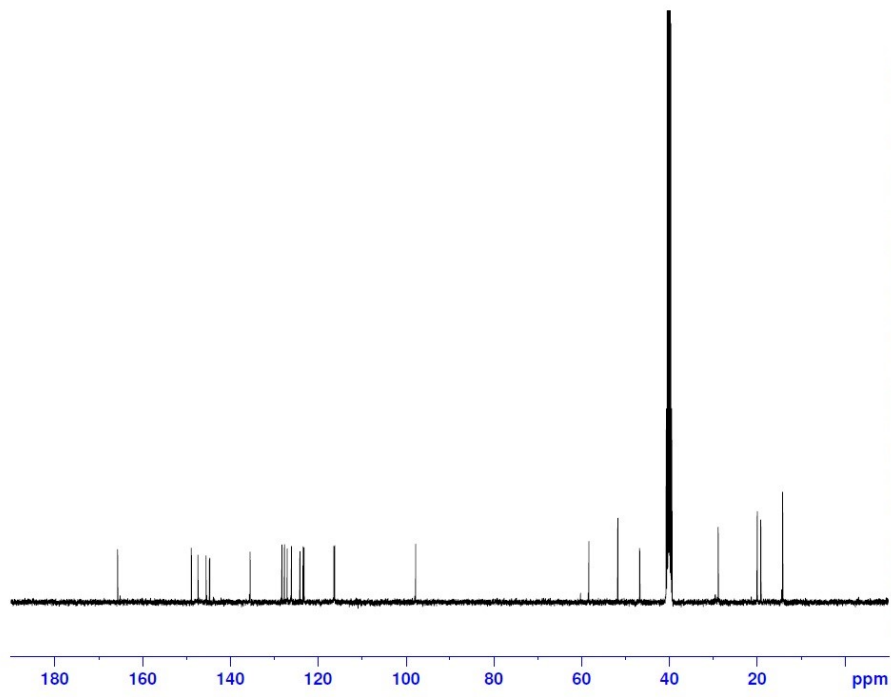

Current Data Parameters  
NAME AI-3 13C  
EXPNO 1  
PROCNO 1

F2 - Acquisition Parameters  
Date\_ 20190906  
Time 10.28 h  
INSTRUM spect  
PROBHD Z108618\_0903 (   
PULPROG zgpg30  
TD 65536  
SOLVENT DMSO  
NS 1024  
DS 4  
SWH 24038.461 Hz  
FIDRES 0.733596 Hz  
AQ 1.3631488 sec  
RG 199.04  
DW 20.800 usec  
DE 6.50 usec  
TE 298.1 K  
D1 2.0000000 sec  
D11 0.0300000 sec  
TD0 1  
SFO1 100.6479773 MHz  
NUC1 13C  
P1 10.00 usec  
PLW1 51.72800064 W  
SFO2 400.2316009 MHz  
NUC2 1H  
CPDPRG[2] waltz16  
PCPD2 90.00 usec  
PLW2 13.95600033 W  
PLW12 0.33892259 W  
PLW13 0.16986801 W

F2 - Processing parameters  
SI 32768  
SF 100.6379135 MHz  
WDW EM  
SSB 0  
LB 1.00 Hz  
GB 0  
PC 1.40

<sup>13</sup>C NMR Spectrum of **5b**



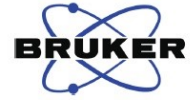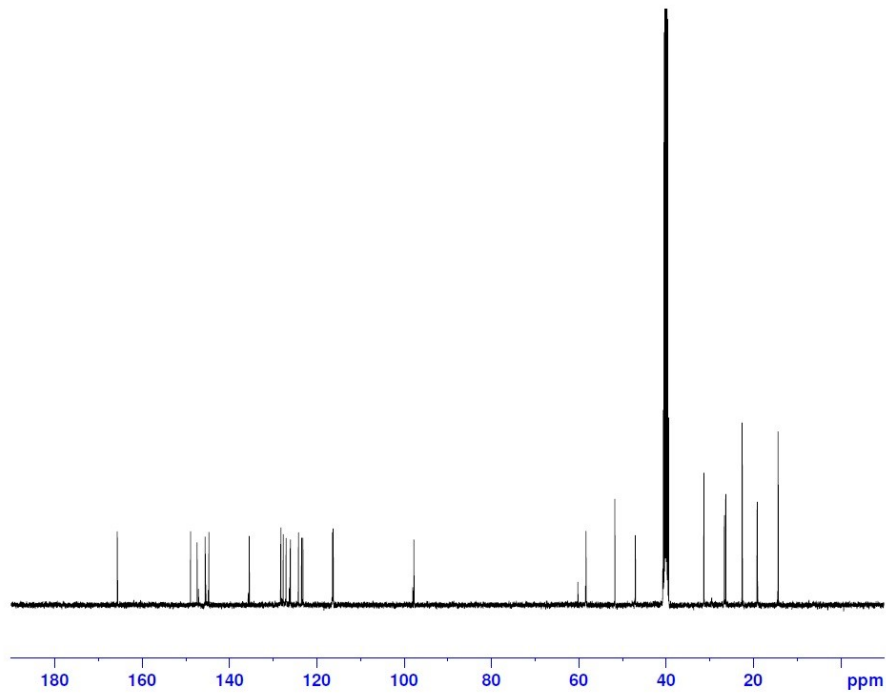

Current Data Parameters  
NAME AI-4 13C  
EXPNO 1  
PROCNO 1

F2 - Acquisition Parameters  
Date\_ 20190906  
Time 12.12 h  
INSTRUM spect  
PROBHD Z108618\_0903 ( )  
PULPROG zgpg30  
TD 65536  
SOLVENT DMSO  
NS 1024  
DS 4  
SWH 24038.461 Hz  
FIDRES 0.733596 Hz  
AQ 1.3631488 sec  
RG 199.04  
DW 20.800 usec  
DE 6.50 usec  
TE 298.0 K  
D1 2.00000000 sec  
D11 0.03000000 sec  
TDO 1  
SFO1 100.6479773 MHz  
NUC1 13C  
P1 10.00 usec  
PLW1 51.72800064 W  
SFO2 400.2316009 MHz  
NUC2 1H  
CPDPRG[2] waltz16  
PCPD2 90.00 usec  
PLW2 13.95600033 W  
PLW12 0.33892259 W  
PLW13 0.16986801 W

F2 - Processing parameters  
SI 32768  
SF 100.6379135 MHz  
WDW EM  
SSB 0  
LB 1.00 Hz  
GB 0  
PC 1.40

<sup>13</sup>C NMR Spectrum of **5c**

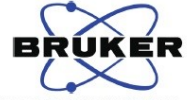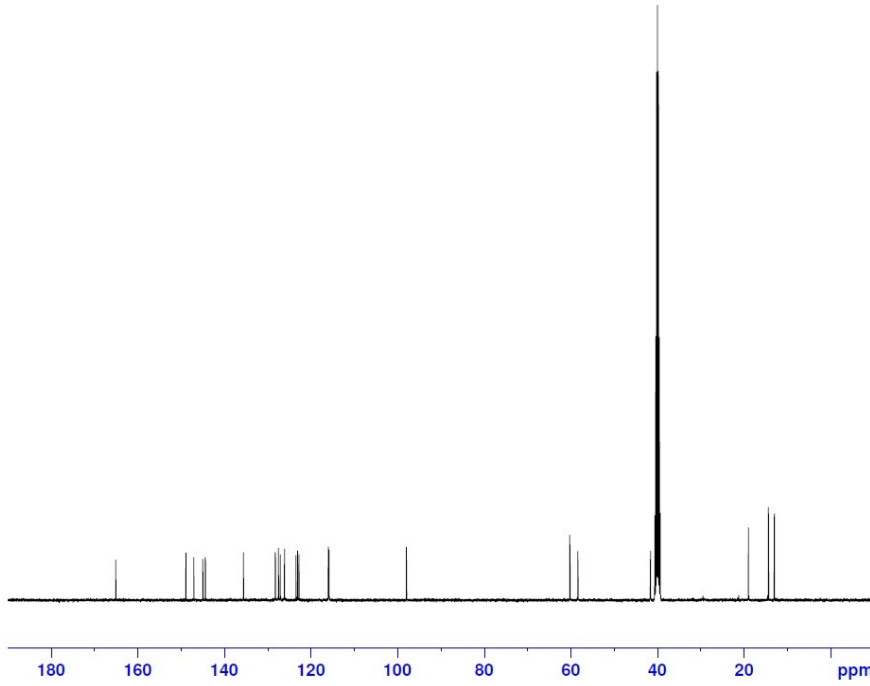

Current Data Parameters  
NAME AI-1 13C  
EXPNO 1  
PROCNO 1

F2 - Acquisition Parameters  
Date\_ 20190903  
Time 12.45 h  
INSTRUM spect  
PROBHD z108618\_0903 (   
PULPROG zgpg30  
TD 65536  
SOLVENT DMSO  
NS 1024  
DS 4  
SWH 24038.461 Hz  
FIDRES 0.733596 Hz  
AQ 1.3631488 sec  
RG 199.04  
DW 20.800 usec  
DE 6.50 usec  
TE 297.4 K  
D1 2.0000000 sec  
D11 0.0300000 sec  
TD0 1  
SFO1 100.6479773 MHz  
NUC1 13C  
P1 10.00 usec  
PLW1 51.72800064 W  
SFO2 400.2316009 MHz  
NUC2 1H  
CPDPRG[2] waltz16  
PCPD2 90.00 usec  
PLW2 13.95600033 W  
PLW12 0.33892259 W  
PLW13 0.16986801 W

F2 - Processing parameters  
SI 32768  
SF 100.6379135 MHz  
WDW EM  
SSB 0  
LB 1.00 Hz  
GB 0  
PC 1.40

<sup>13</sup>C NMR Spectrum of **6a**

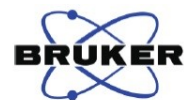

Current Data Parameters  
NAME AI-12.8 13C  
EXPNO 1  
PROCNO 1

F2 - Acquisition Parameters  
Date\_ 20190208  
Time 10.54 h  
INSTRUM spect  
PROBHD Z108618 0903 (   
PULPROG zgpg30  
TD 65536  
SOLVENT DMSO  
NS 1024  
DS 4  
SWH 24038.461 Hz  
FIDRES 0.733596 Hz  
AQ 1.3631488 sec  
RG 199.04  
DW 20.800 usec  
DE 6.50 usec  
TE 298.1 K  
D1 2.0000000 sec  
D11 0.0300000 sec  
TDO 1  
SFO1 100.6479773 MHz  
NUC1 13C  
P1 10.00 usec  
PLW1 51.72800064 W  
SFO2 400.2316009 MHz  
NUC2 1H  
CFDPRG[2] waltz16  
PCPD2 90.00 usec  
PLW2 13.95600033 W  
PLW12 0.33892259 W  
PLW13 0.16986801 W

F2 - Processing parameters  
SI 32768  
SF 100.6379135 MHz  
WDW EM  
SSB 0  
LB 1.00 Hz  
GB 0  
PC 1.40

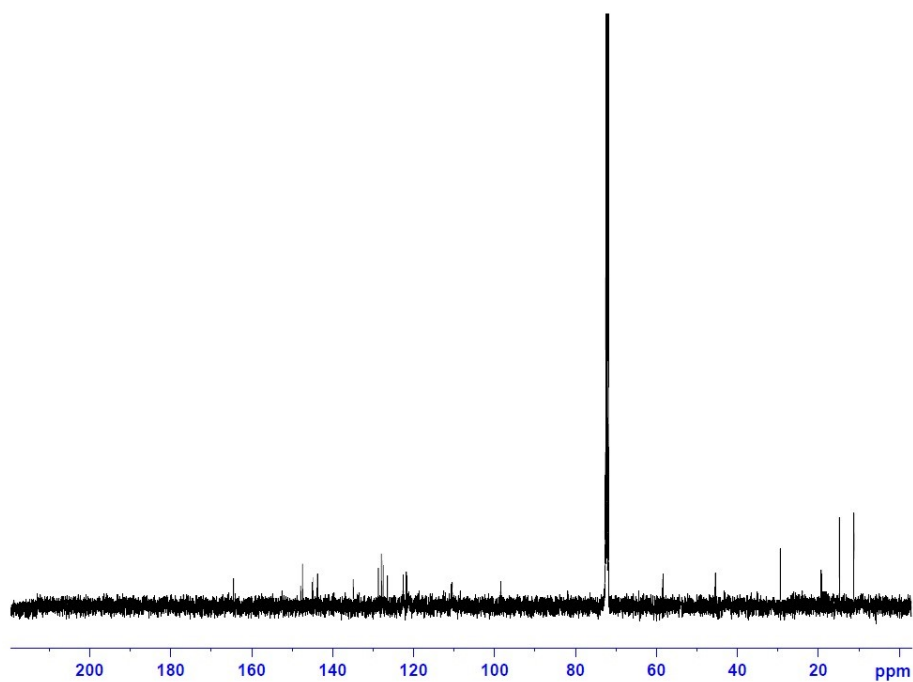

<sup>13</sup>C NMR Spectrum of **6b**

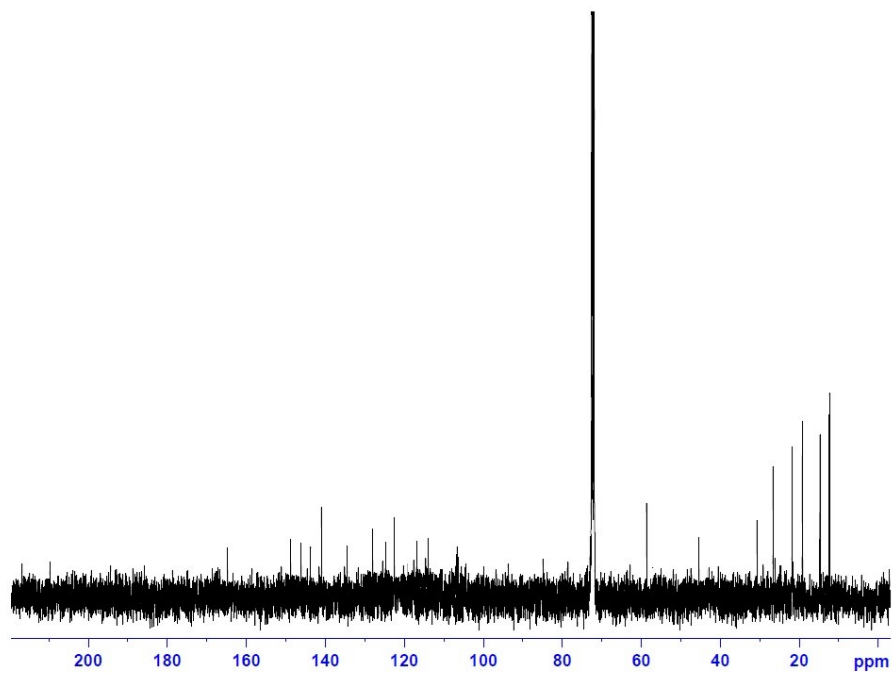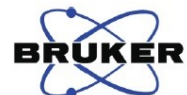

```

Current Data Parameters
NAME      AI-12.9  13C
EXPNO    1
PROCNO   1

F2 - Acquisition Parameters
Date_    20190208
Time     16.11 h
INSTRUM  spect
PROBHD   Z108618_0903 (
PULPROG  zgpg30
TD       65536
SOLVENT  DMSO
NS       1024
DS       4
SWH      24038.461 Hz
FIDRES   0.733596 Hz
AQ       1.3631488 sec
RG       199.04
DW       20.800 usec
DE       6.50 usec
TE       298.3 K
D1       2.0000000 sec
D11      0.0300000 sec
TDO      1
SFO1     100.6479773 MHz
NUC1     13C
P1       10.00 usec
PLW1     51.7280064 W
SFO2     400.2316009 MHz
NUC2     1H
CPDPRG2  waltz16
PCPD2    90.00 usec
PLW2     13.95600033 W
PLW12    0.33892259 W
PLW13    0.16986801 W

F2 - Processing parameters
SI       32768
SF       100.6379135 MHz
WDW      EM
SSB      0
LB       1.00 Hz
GB       0
PC       1.40

```

<sup>13</sup>C NMR Spectrum of 6c

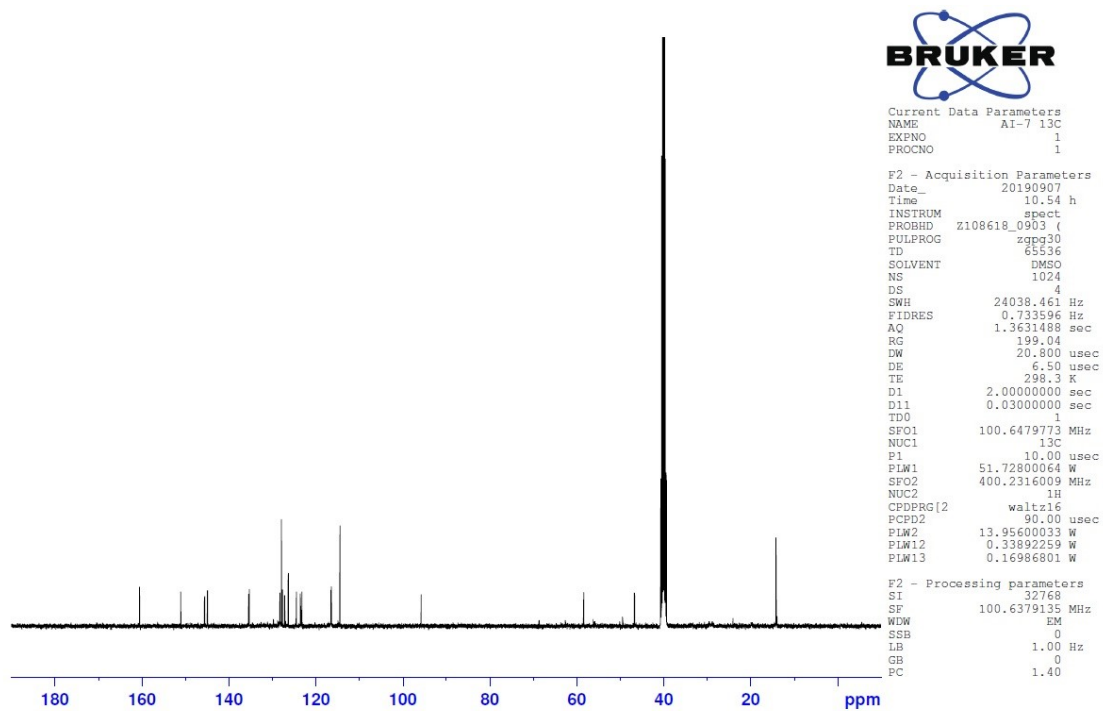

$^{13}\text{C}$  NMR Spectrum of **7a**

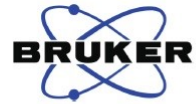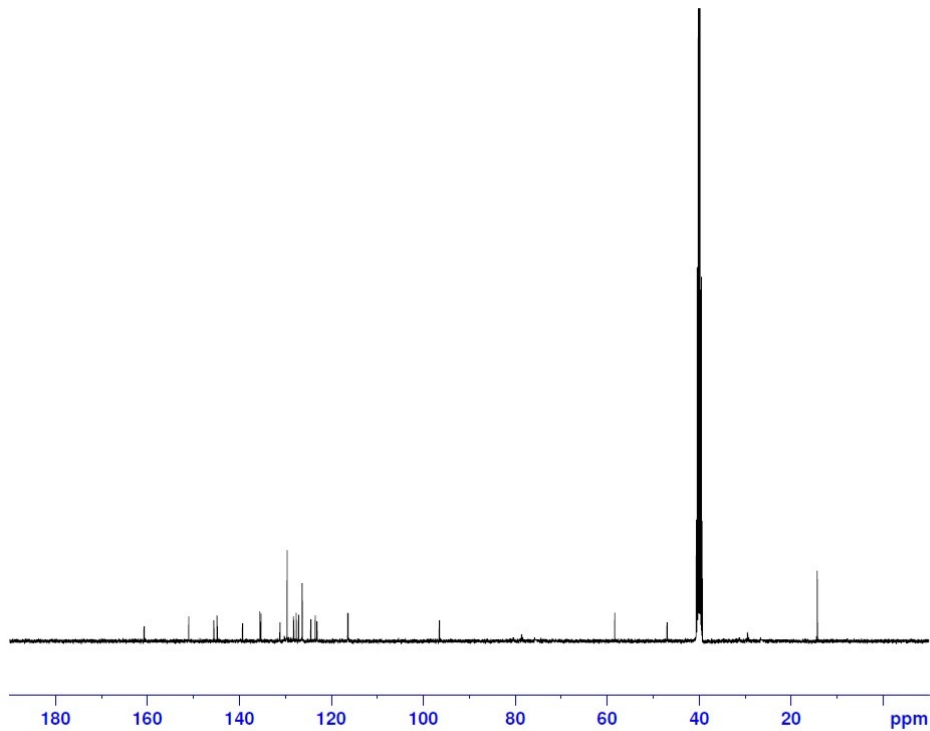

Current Data Parameters  
NAME AI-8 13C  
EXPNO 1  
PROCNO 1

F2 - Acquisition Parameters  
Date\_ 20190907  
Time 12.54 h  
INSTRUM spect  
PROBHD Z108618\_0903 (   
PULPROG zgpg30  
TD 65536  
SOLVENT DMSO  
NS 1024  
DS 4  
SWH 24038.461 Hz  
FIDRES 0.733596 Hz  
AQ 1.3631488 sec  
RG 199.04  
DW 20.800 usec  
DE 6.50 usec  
TE 298.1 K  
D1 2.00000000 sec  
D11 0.03000000 sec  
TD0 1  
SFO1 100.6479773 MHz  
NUC1 13C  
P1 10.00 usec  
PLW1 51.72800064 W  
SFO2 400.2316009 MHz  
NUC2 1H  
CPDPRG[2] waltz16  
PCPD2 90.00 usec  
PLW2 13.95600033 W  
PLW12 0.33892259 W  
PLW13 0.16986801 W

F2 - Processing parameters  
SI 32768  
SF 100.6379135 MHz  
WDW EM  
SSB 0  
LB 1.00 Hz  
GB 0  
PC 1.40

<sup>13</sup>C NMR Spectrum of **9a**

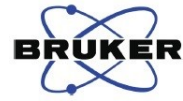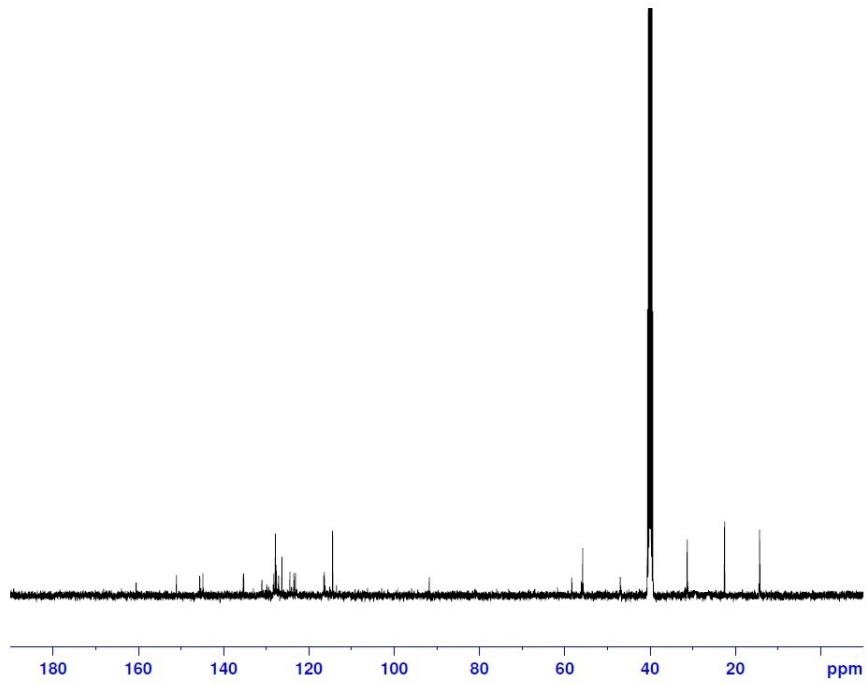

Current Data Parameters  
NAME AI-9 13C  
EXPNO 1  
PROCNO 1

F2 - Acquisition Parameters  
Date\_ 20190907  
Time 14.10 h  
INSTRUM spect  
PROBHD Z100618\_0903 ( )  
PULPROG zgpg30  
TD 65536  
SOLVENT DMSO  
NS 1024  
DS 4  
SWH 24038.461 Hz  
FIDRES 0.733596 Hz  
AQ 1.3631488 sec  
RG 199.04  
DW 20.800 usec  
DE 6.50 usec  
TE 298.0 K  
D1 2.00000000 sec  
D11 0.03000000 sec  
TDO 1  
SFO1 100.6479773 MHz  
NUC1 13C  
P1 10.00 usec  
PLW1 51.72800664 W  
SFO2 400.2316009 MHz  
NUC2 1H  
CPDPRG2 waltz16  
PCPD2 90.00 usec  
PLW2 13.95600033 W  
PLW12 0.33892259 W  
PLW13 0.16986801 W

F2 - Processing parameters  
SI 32768  
SF 100.6379135 MHz  
WDW EM  
SSB 0  
LB 1.00 Hz  
GB 0  
PC 1.40

<sup>13</sup>C NMR Spectrum of **9b**

C:\Users\maksh\Downloads\AI-4.raw

6/13/2024 9:44:28 AM

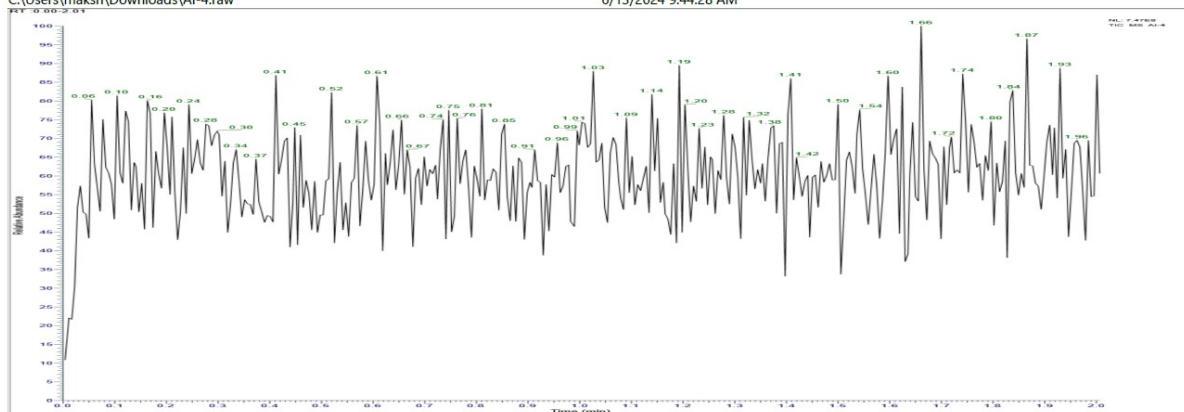

AI-4 #58 RT: 0.31 AV: 1 NL: 4.09E7

T: FTMS + p ESI Full ms [100.0000-1000.0000]

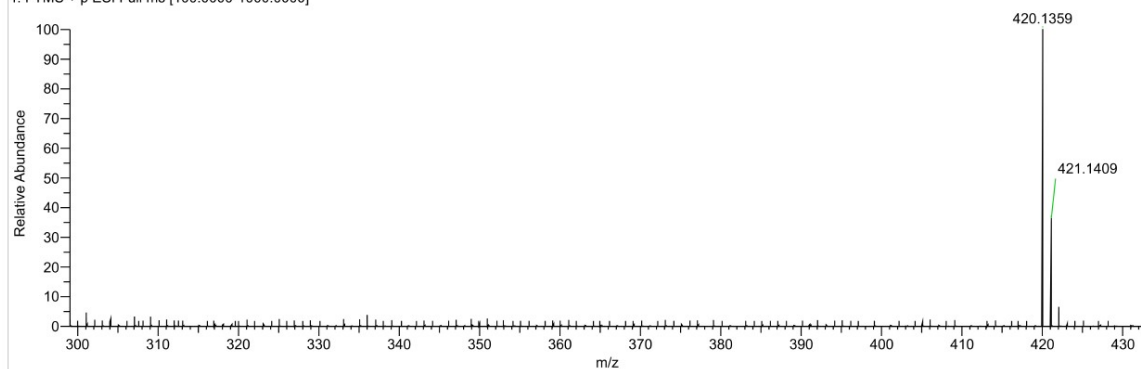

HRMS spectrum of **5a**



C:\Users\maksh\Downloads\AI-6.raw

6/13/2024 9:34:31 AM

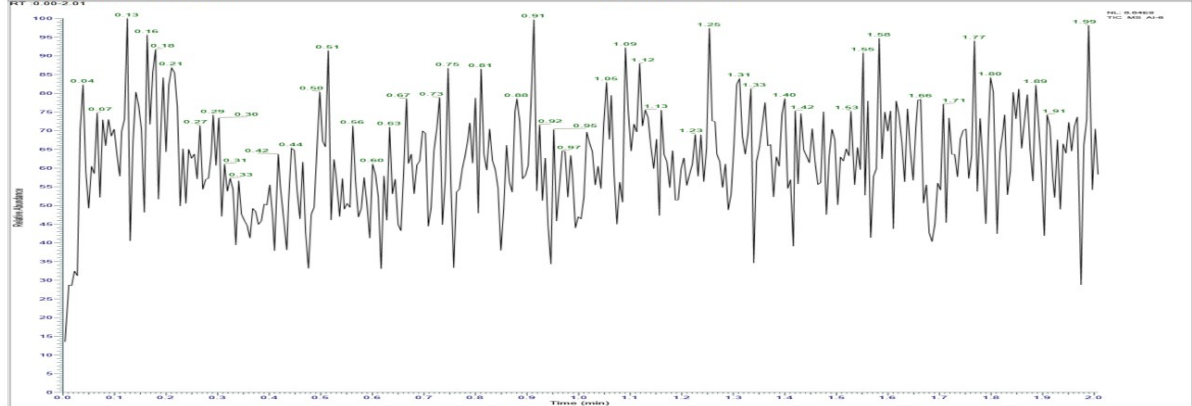

AI-6 #46 RT: 0.25 AV: 1 NL: 3.15E6  
T: FTMS + p ESI Full ms [100.0000-1000.0000]

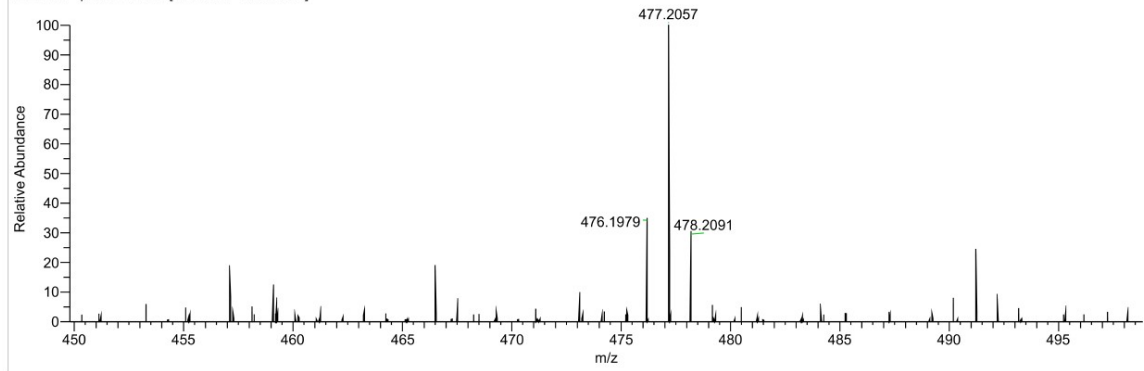

HRMS spectrum of **5c**

C:\Users\maksh\Downloads\AI-1.raw

6/13/2024 9:53:32 AM

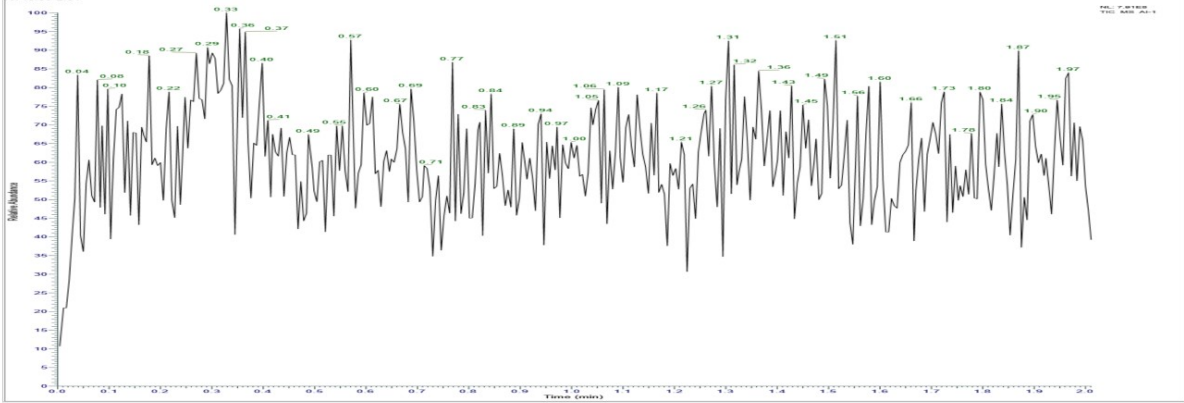

AI-1 #53 RT: 0.29 AV: 1 NL: 1.47E7  
T: FTMS + p ESI Full ms [100.0000-1000.0000]

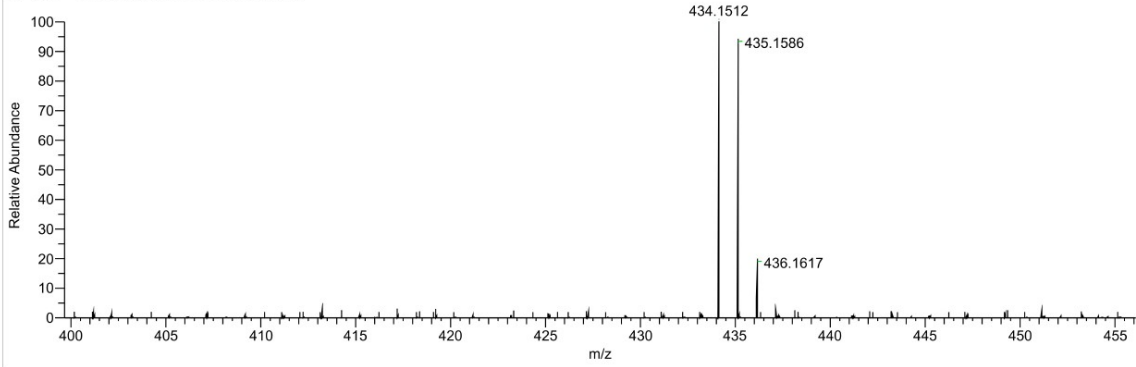

HRMS spectrum of **6a**
